## Specific excitatory connectivity for feature integration in mouse primary visual cortex

**Authors:** Dylan R Muir<sup>1,3</sup>, Patricia Molina-Luna<sup>2</sup>, Morgane M Roth<sup>1,2</sup>, Fritjof Helmchen<sup>2</sup> and Björn M Kampa<sup>2,3,4</sup>

1. Biozentrum, University of Basel, Klingelbergstrasse 50/70, 4056 Basel, Switzerland.

2. Laboratory of Neural Circuit Dynamics, Brain Research Institute, University of Zurich, Winterthurerstrasse 190, 8057 Zurich, Switzerland.

3. Department of Neurophysiology, Institute of Biology 2, RWTH Aachen University, Templergraben 55, 52062 Aachen, Germany.

4. JARA-BRAIN, 52074 Aachen, Germany.

**Running title:** Non-random cortical connectivity and feature integration

**Major subject area:** Neuroscience

**Keywords:** amplification; competition; decorrelation; cortical computation; mouse V1

**Corresponding author:** Dylan Muir, Biozentrum, University of Basel, Klingelbergstrasse 50/70, 4056 Basel, Switzerland.

**Phone:** +41 61 207 17 75

**Fax:** +41 61 207 21 89

**Email:** [dylan.muir@unibas.ch](mailto:dylan.muir@unibas.ch)

## Abstract

1           Abstract

2           In mouse visual cortex (V1) many neurons respond to overlapping grating stimuli

3           (plaid stimuli) with highly selective and facilitatory responses, which are not

4           simply predicted by responses to single gratings presented alone. This complexity

5           is surprising since excitatory neurons in V1 are considered to be mainly tuned to

6           single preferred orientations. We hypothesised that complex responses to plaid

7           stimuli may arise as a consequence of rules for selective excitatory connectivity

8           within the local network in the superficial layers of mouse V1. Although local

9           excitatory connections have been found to be more prevalent and stronger

10          between neurons that share similar functional response features, the extent to

11          which local connectivity rules shape neuronal responses in V1 and the details of

12          how network structure relates to functional responses remain unknown. Here we

13          examined two possible alternative connectivity schemes: in the first case, *local con-*

14          *nections are aligned with visual properties inherited from feedforward input* (a ‘like-

15          to-like’ scheme specifically connecting neurons that share similar preferred ori-

16          entations); in the second case, *local connections group neurons into excitatory subnet-*

17          *works that combine and amplify multiple feedforward visual properties (a ‘feature*

18          *binding’ scheme)*. By comparing predictions from large scale computational models

19          with *in vivo* recordings of visual representations in mouse V1, we found that

20          responses to plaid stimuli were best explained by assuming ‘feature binding’ con-

21          nectivity. Unlike under the ‘like-to-like’ scheme, selective amplification within

22          feature-binding excitatory subnetworks replicated experimentally observed facilit-

23          atory responses to plaid stimuli; explained selective plaid responses not predicted

24          by grating selectivity; and was consistent with broad anatomical selectivity

25          observed in mouse V1. Our results show that visual feature binding can occur

26          through local recurrent mechanisms without requiring feedforward convergence,

27          and that such a mechanism is consistent with visual responses in mouse V1.

## 28 Author summary

29 The brain is a highly complex structure, with abundant connectivity between  
30 nearby neurons in the neocortex, the outermost and evolutionarily most recent  
31 part of the brain. Although the network architecture of the neocortex can appear  
32 disordered, connections between neurons seem to follow certain rules. These rules  
33 most likely determine how information flows through the neural circuits of the  
34 brain, but the relationship between particular connectivity rules and the function  
35 of the cortical network is not known. We built models of visual cortex in the  
36 mouse, assuming distinct rules for connectivity, and examined how the various  
37 rules changed the way the models responded to visual stimuli. We also recorded  
38 responses to visual stimuli of populations of neurons in anaesthetised mice, and  
39 compared these responses with our model predictions. We found that connections  
40 in neocortex probably follow a connectivity rule that groups together neurons that  
41 differ in simple visual properties, to build more complex representations of visual  
42 stimuli. This finding is surprising because primary visual cortex is assumed to sup-  
43 port mainly simple visual representations. We show that including specific rules  
44 for non-random connectivity in models of the brain is crucial. Precise measure-  
45 ments of those rules in real brains is also essential.

## 46 Introduction

47 Much of our current understanding of local cortical connectivity in neuronal cir-  
48 cuits of the neocortex is based on the presumption of randomness. Anatomical  
49 methods for estimating connection probabilities [1,2] and techniques for using  
50 anatomical reconstructions to build models of cortical circuits [3-7] are largely  
51 based on the assumption that connections between nearby neurons are made  
52 stochastically in proportion to the overlap between axonal and dendritic arborisa-  
53 tions [8].

54 On the other hand, a wealth of evidence spanning many cortical areas and several  
55 species indicates that cortical connectivity is not entirely random. In species that  
56 display smooth functional maps in primary visual cortex (V1), such as cat and  
57 macaque monkey, long-range intrinsic excitatory connections tend to preferen-

58 tially connect regions of similar function [9-13]. Although rodents exhibit a map-  
59 less, “salt and pepper” representation of basic visual features across V1 [14], non-  
60 random connectivity is nonetheless prevalent both within and between cortical  
61 layers [15-20], reflecting similarities in functional properties [21-25] or projection  
62 targets [26-28].

63 The degree of specificity of cortical connections among excitatory neurons thus  
64 appears to be an important feature of local circuitry, which likely influences the  
65 functional response properties of cortical neurons [24,29]. In spite of its relevance,  
66 the impact of specific excitatory connectivity on network representations of sens-  
67 ory inputs and information processing has not been addressed experimentally or  
68 through theory; it therefore remains an open question how the arrangement of  
69 local recurrent connections affects cortical representations of visual stimuli. Des-  
70 pite multiple descriptions of specific connectivity in cortex, the rules underlying  
71 the configuration of these connections are not entirely clear. Whereas strong con-  
72 nections are more prevalent between neurons with similar receptive fields, the  
73 majority of synaptic connections are made between neurons with poorly-correl-  
74 ated receptive fields and poorly correlated responses [24]. This sea of weak syn-  
75 aptic inputs might be responsible for non-feature-specific depolarisation [24] or  
76 might permit plasticity of network function [20]. However, another possibility is  
77 that weaker connections underlie higher-order connectivity rules that have not yet  
78 been described. For example, we recently showed that neuronal responses to com-  
79 pound visual stimuli (e.g. plaid stimuli composed of two grating components) can  
80 be selective and highly complex in mouse V1 [30]. We proposed that local con-  
81 nectivity in V1 could be structured such that simple visual features were bound  
82 together through recurrent interactions [30]. But what is the exact relationship  
83 between connectivity rules and information processing in visual cortex? And how  
84 do the rules governing specific excitatory connectivity, which we know to exist in  
85 rodents [15,21,24], shape and inform visual representations?

86 Here we examined these questions by analysing the computational properties of  
87 cortical networks with defined rules for local connectivity. We simulated visual  
88 responses to grating and plaid stimuli in large networks with properties designed

89 to resemble the superficial layers of mouse V1, assuming distinct connectivity  
90 schemes. We then compared the response patterns and visual representations pre-  
91 dicted by the network simulations with those recorded *in vivo* in mouse V1.

92 Specifically, we evaluated two broad classes of connectivity patterns, where specific  
93 local excitatory connectivity is defined according to the visual response properties  
94 of neurons (Fig.1):

- 95 1. Strictly “like-to-like” connectivity, such that neurons with similar response prop-  
96 erties defined by their feed-forward inputs to each neurons (e.g. orientation  
97 tuning of neurons in the superficial layers, arising from tuned input from layer 4)  
98 are grouped into subnetworks;
- 99 2. A form of “feature-binding” connectivity, such that excitatory neurons with differ-  
100 ing feed-forward visual properties (e.g. distinct orientation preference) are  
101 grouped together.

102 \*\*\*\* FIGURE 1 NEAR HERE \*\*\*\*

103 These distinct rules give rise to radically different visual representations of plaid  
104 stimuli, both in terms of complexity of visual response selectivity of individual  
105 neurons and regarding facilitation versus suppression in response to these com-  
106 pound stimuli. We found that the complexity of plaid responses in mouse V1 was  
107 reproduced in our simulations when assuming the ‘feature-binding’ connectivity  
108 scheme, with local connections cutting across feedforward response properties,  
109 but not when assuming purely ‘like-to-like’ connections.

110 Our results therefore suggest that local excitatory connections within mouse V1  
111 are formed with respect to complex or compound visual response properties, such  
112 that they do not necessarily align with simpler feedforward properties. This pat-  
113 tern of connectivity would allow subnetworks in V1 to detect particular configura-  
114 tions of visual stimuli, and might be used to tune visual cortex to the complex  
115 statistics of natural vision.

116

## Results

117

### **Responses to plaid stimuli are selective and facilitatory in mouse V1**

118

119

Under the assumption that the configuration of local recurrent connections in cortex might lead to differential processing of simple and compound visual stimuli, it is important to quantify the relationship between responses to grating and plaid stimuli in visual cortex. Recent reports have highlighted the facilitatory and selective nature of plaid responses in mouse primary visual cortex [30-32]. Most neurons in mouse V1 respond to plaid stimuli in accordance with a simple superimposition of their responses to the two underlying grating components (i.e. “component cell” responses; [33]). However, a significant proportion of neurons that are visually responsive, reliable and selective exhibit complex responses to plaid stimuli that are difficult to explain with respect to simple combinations of grating components [30]. Plaid stimuli are often constructed from a single choice of relative component angle (90° orthogonal gratings), leaving open the possibility that a richer set of plaid stimuli would help to classify neurons with these complex responses.

132

133

We therefore probed mouse V1 with grating component stimuli composed of grating stimuli with 16 drift directions, and three full sets of plaid stimuli composed of 45°, 90° and 135° relative grating component orientations. We recorded responses from layer 2/3 neurons in V1 using two-photon imaging of animals with viral delivery of GCaMP6m (Fig. 2a-f; 8 animals, 8 sessions, 441/879 responsive/imaged neurons; see Methods). We defined a modulation index (MI) to quantify the degree of facilitation or suppression elicited by plaid stimuli over grating stimuli, for single cortical neurons; large positive values for MI indicate strong facilitation in response to plaid stimuli, whereas large negative values indicate strong suppression (see Methods). Visual responses to the full set of plaid stimuli were dominated by facilitation, and were significantly more facilitatory than when considering only the set of 90° plaids (Fig. 2i; median modulation

144

145 index MI  $0.098 \pm [0.081 \ 0.12]$  vs  $0.011 \pm [-0.0060 \ 0.027]$ ;  $p < 1 \times 10^{-10}$ , Wilcoxon  
146 rank-sum; all following values are reported as median  $\pm$  95% bootstrap confidence  
147 intervals unless stated otherwise).

148 \*\*\*\* FIGURE 2 NEAR HERE \*\*\*\*

149 The presence of stronger facilitation when comparing responses to the full set of  
150 plaid stimuli with responses to 90° plaids alone, is consistent with our earlier find-  
151 ing that some neurons in mouse V1 are highly selective for particular combina-  
152 tions of grating components [30]. Accordingly, we used a plaid selectivity index  
153 (PSI) to quantify how selective were the responses of single neurons over the set  
154 of plaid stimuli (see Methods). The PSI was defined in analogy to orientation or  
155 direction selectivity indices (OSI or DSI), such that values of PSI close to 1 indic-  
156 ate that a neuron responds to only a single plaid stimulus out of the set of presen-  
157 ted plaid stimuli. Values of PSI close to 0 indicate that a neuron responds equally  
158 to all plaid stimuli. Responses to the full set of plaid stimuli were highly selective;  
159 significantly more selective than predicted by a component model generated using  
160 all plaid and grating stimuli (Fig. 2h; median PSI  $0.38 \pm [0.36 \ 0.41]$  vs  $0.30 \pm [0.28$   
161  $0.31]$ ;  $p < 1 \times 10^{-10}$ , Wilcoxon rank-sum) and indeed significantly more selective  
162 than responses to the 90° plaids alone (Fig. 2h; median 90° PSI  $0.25 \pm [0.23 \ 0.28]$ ;  
163  $p < 1 \times 10^{-10}$  vs all plaids, Wilcoxon rank-sum).

164 Therefore, probing visual cortex with a dense set of plaid stimuli reveals richer  
165 visual responses than when probed with a set of only 90° plaids. Indeed, recent  
166 results suggest that using an expanded set of plaid stimuli evokes more pattern-  
167 cell responses in mouse V1 [32]. Consistent with this finding, our results show  
168 that using a dense set of plaids does not make responses to compound stimuli  
169 trivial to predict based on component responses. In addition, we found that visual  
170 responses were more facilitatory and more selective than when measured using  
171 90° plaids alone.

172 **Local excitatory connections in cortex are broadly selective for**  
173 **preferred orientation**

174 How are selective responses to plaid stimuli generated in V1? As we suggested  
175 previously, one possibility is that specific grating component representations are  
176 combined through local excitatory connectivity [30]. Synaptic connection probab-  
177 ility is enhanced by similarity of orientation preference [21,23,25], suggesting that  
178 local excitatory connections may group together neurons with common preferred  
179 orientations. Connection probability is even more strongly modulated by neuronal  
180 response correlations to natural movies; i.e., the likelihood for a synaptic connec-  
181 tion is higher for neuronal pairs responding similarly to natural scenes [21,22,24].

182 If connections in mouse V1 were strictly governed by preferred orientation, then  
183 neurons with similar orientation preference should also predominately have sim-  
184 ilar responses to natural movies, and vice versa. We recorded visual responses pop-  
185 ulations of neurons labelled with the synthetic calcium indicator OGB in anaes-  
186 thetized mouse V1 (5 animals, 129/391 responsive neurons with overlapping  
187 receptive fields/ imaged neurons; Fig.3a-c; see Methods). We used signal correla-  
188 tions to measure the similarity between the responses of pairs of neurons with  
189 identified receptive fields (Fig.3a) to drifting grating (Fig.3b) and natural movie  
190 (Fig.3c) visual stimuli (see Methods).

191 We found that neuronal pairs with high signal correlations to natural scenes,  
192 which are most likely to be connected in cortex [21,22,24], showed only a weak  
193 tendency to share similar orientation preferences (Fig.3d-e; pairs with OSI > 0.3;  
194  $p=0.8$ , Kruskal-Wallis). This is consistent with earlier findings in cat area 17 (V1),  
195 which showed a poor relationship between responses to gratings and natural  
196 movies [34].

197 \*\*\*\* FIGURE 3 NEAR HERE \*\*\*\*

198 Similarly, under a like-to-like connectivity rule, synaptically connected neurons in  
199 mouse V1 should share both similar orientation preference and responsiveness to  
200 natural movies. We therefore compared response correlations and preferred ori-  
201 entations for pairs of mouse V1 neurons, which were known to be connected from



202 *in vivo/in vitro* characterisation of functional properties and connectivity (data  
203 from [24] used with permission; 17 animals, 203 patched and imaged cells, 75 con-  
204 nected pairs). Consistent with our results comparing responses to gratings and  
205 natural movies, connected pairs of cells with similar orientation preference were  
206 not more likely to share a high signal correlation to flashed natural scenes (Fig. 3f;  
207  $p=0.54$ , Kruskal-Wallis). Also consistent with earlier findings [21,23], we  
208 observed a positive relationship between synaptic connectivity and similarity of  
209 orientation preference (Fig. 3g;  $p=0.045$ , Ansari-Bradley test). However, strongly  
210 connected pairs (strongest 50% of excitatory post-synaptic poten-  
211 tials—EPSPs—over connected pairs) were not more similar in their preferred  
212 orientation than the remaining pairs ( $p=0.17$ , Ansari-Bradley test vs weakest 50%  
213 of connected pairs). Connected pairs spanned a wide bandwidth of preferred ori-  
214 entations, with more than 20% of connections formed between neurons with  
215 orthogonal preferred orientations. Spatial correlation of receptive fields is a com-  
216 paratively better predictor for synaptic connectivity than shared orientation pref-  
217 erence, but a majority of synaptic inputs are nevertheless formed between neurons  
218 with poorly- or un-correlated responses [24]. We conclude that similarity in ori-  
219 entation preference only partially determines connection probability and strength  
220 between pairs of neurons in mouse V1.

221 This weak functional specificity for similar visual properties can be explained by  
222 two possible alternative connectivity rules. In the first scenario, local excitatory  
223 connections in cortex are aligned with feedforward visual properties, but with  
224 broad tuning (Fig. 1a; a “like-to-like” rule). As a consequence, all connections  
225 show an identical weak bias to be formed between neurons within similar tuning,  
226 and the average functional specificity reported in Fig. 3g and elsewhere [21,24]  
227 reflects the true connection rules between any pair of neurons in cortex.

228 Alternatively, local excitatory connections may be highly specifically tuned but  
229 follow rules that are not aligned with feedforward visual properties (Fig. 1b; a “fea-  
230 ture-binding” rule). If measurements of functional specificity were made pair-wise  
231 and averaged across a large population, any specific tuning shared within groups  
232 of neurons would therefore be averaged away and appear as a sea of random con-  
233 nections. For example, subpopulations of excitatory neurons might share a small

234 set of feedforward visual properties; in this case, connections within a subpopula-  
235 tion could still be highly specific, but this specificity would not be detected  
236 through purely pairwise measurements.

## 237 **Specific connectivity gives rise to amplification and competition**

238 The dynamics of neuronal networks defined with particular connectivity rules  
239 remains generally unknown, although some results suggest that specific con-  
240 nectivity leads to reduced dimensionality of network activity patterns [35]. We  
241 therefore explored the relationship between specific connectivity and network  
242 dynamical properties in a non-linear, rate-based network model incorporating  
243 realistic estimates for recurrent excitatory and inhibitory connection strength in  
244 layers 2/3 of mouse V1 (“analytical model”; Fig. 4; see Methods). This small model  
245 consists of four excitatory and one inhibitory neuron with homogenous con-  
246 nectivity (Fig. 4a), designed to be equivalent to a much larger model with  
247 stochastic synaptic connectivity. As is suggested by estimations of strong excitat-  
248 ory feedback in cortex [4,36], our model required inhibitory feedback to maintain  
249 stability (an inhibition-stabilised network or ISN; Fig. S1; [37-40]; but see [41]).

250 \*\*\*\*\* FIGURE 4 NEAR HERE \*\*\*\*\*

251 Non-random connectivity, in the form of specific excitatory connections within  
252 subnetworks (Fig. 4b; SNs; [15,18]), introduced selective amplification within sub-  
253 networks and competition between subnetworks (Fig. 4c). Surprisingly, these  
254 computational mechanisms were strongly expressed even when only a minority of  
255 synapses ( $s$  around 20%) were made to be subnetwork-specific (Fig. 4c; Fig. S1).  
256 Specific connectivity rules resulted in functional grouping of sets of excitatory  
257 neurons (Fig. 4b), permitting the network to operate in a soft winner-take-all  
258 regime [42,43].

259 Neither competition nor amplification was present under parameters designed to  
260 approximate random connectivity in mouse V1 (Fig. 4a, c; Fig. S1). This is not  
261 because the network architecture was incapable of expressing competition, but  
262 because the recurrent excitatory connections were insufficiently strong under

263 assumptions of random stochastic connectivity. We conclude that specific excitat-  
264 ory connectivity strongly promotes amplification and competition in neuronal  
265 responses.

## 266 **Selective amplification under like-to-like and feature-binding** 267 **connectivity rules**

268 Amplification in the network with specific connectivity is *selective* (Fig. 4b–c):  
269 neurons within a subnetwork recurrently support each other’s activity, while neur-  
270 ons in different subnetworks compete. Therefore, which sets of neurons will be  
271 amplified or will compete during visual processing depends strongly on the pre-  
272 cise rules used to group neurons into subnetworks. We therefore examined the  
273 impact of “like-to-like” and “feature-binding” rules on responses in our analytical  
274 model. The excitatory network was partitioned into two subnetworks; connections  
275 within a subnetwork corresponded to selective local excitatory connectivity within  
276 rodent V1. Under the “like-to-like” rule, neurons with similar orientation prefer-  
277 ences were grouped into subnetworks (Fig. 4d). We tested the response of this  
278 network architecture to simulated grating and plaid stimuli, by injecting currents  
279 into neurons according to the similarity between the orientation preference of  
280 each neuron and the orientation content of a stimulus. Under the “like-to-like”  
281 rule, responses of pairs of neurons to simple grating stimuli and more complex  
282 plaid stimuli were highly similar (Fig. 4d). Amplification occurred within subnet-  
283 works of neurons with the same preferred orientation, and competition between  
284 subnetworks with differing preferred orientation [42,44] (visible by complete sup-  
285 pression of response of neurons in lower traces of Fig. 4d).

286 Alternatively, we configured the network such that the rules for local excitatory  
287 connectivity did not align with feedforward visual properties (a “feature-binding”  
288 rule). We configured subnetworks by grouping neurons showing preference for  
289 either of two specific orientations (Fig. 4e). When this “feature-binding” con-  
290 nectivity rule was applied, neuronal responses to grating and plaid stimuli differed  
291 markedly (cf. top vs bottom panels of Fig. 4e). Selective amplification was now  
292 arrayed within populations of neurons spanning differing orientation preferences,

293 and competition occurred between subnetworks with different compound feature  
294 preferences. Importantly, a “feature-binding” rule implies that neurons with the  
295 same preferred orientation could exist in competing subnetworks. While their  
296 responses to a simple grating of the preferred orientation would be similar and  
297 correlated (Fig. 4e; indicated by a high response correlation measured over grating  
298 responses  $\rho_g$ ), the same two neurons would show decorrelated responses to a plaid  
299 stimulus (Fig. 4e; indicated by a low response correlation measured over plaid  
300 responses  $\rho_p$ ). We conclude that changes in pairwise response similarity, provoked  
301 by varying the inputs to a network, can provide information about the connectiv-  
302 ity rules present in the network.

### 303 **Feature-binding connectivity leads to facilitation and** 304 **decorrelation in large networks**

305 The results of our simulations of small networks suggest that rules for specific  
306 local connectivity can modify the correlation of activity between two neurons in a  
307 network, depending on the input to the network. The question follows how con-  
308 nectivity rules shape distributed representations of visual stimuli, examined across  
309 a large network and over a broad set of stimuli.

310 We therefore simulated the presentation of grating and plaid visual stimuli in a  
311 large-scale non-linear, rate-based model of the superficial layers of mouse V1, con-  
312 sisting of 80,000 neurons (of which approximately 20% were inhibitory; [45,46];  
313 see Table 1 for all parameters used in these models). Non-spiking linear-threshold  
314 neuron models provide a good approximation to the F-I curves of adapted cor-  
315 tical neurons [47]; model neurons with linear-threshold dynamics can be directly  
316 translated into integrate-and-fire models with more complex dynamics [48,49],  
317 and in addition form good approximations to conductance-based neuron models  
318 [50].

319 Our model included realistic estimates for connection strength and connection  
320 sparsity in mouse V1, and a random salt-and-pepper arrangement of orientation  
321 preference as reported for rodent V1 [14]. We defined connection rules for sparse  
322 stochastic connectivity based primarily on overlap of dendritic and axonal fields,

323 modulated by connectivity rules designed to test the difference between “like-to-  
324 like” and “feature-binding” schemes. We quantified response similarity between  
325 pairs of neurons as suggested by the results of the small network simulations: by  
326 measuring response similarity over a set of grating stimuli ( $\rho_g$ ), and separately  
327 over a set of plaid stimuli ( $\rho_p$ ; see Methods).

328 In the network that implemented a “like-to-like” connection rule for recurrent  
329 excitatory connectivity (Fig. 5a–b), pairs of neurons showed similar responses to  
330 both grating and plaid stimuli (Fig. 5b;  $R^2=0.83$  between  $\rho_g$  and  $\rho_p$ ), in agreement  
331 with the analytical “like-to-like” model of Fig. 4d.

332 \*\*\*\* FIGURE 5 NEAR HERE \*\*\*\*

333 However, in the network that implemented a “feature-binding” connection rule,  
334 where in addition to spatial proximity and similarity in preferred orientation sub-  
335 networks were defined to group neurons of two distinct preferred orientations  
336 (Fig. 5c–d), neurons showed decorrelation in response to plaid stimuli (Fig. 5d,  
337  $R^2=0.13$  between  $\rho_g$  and  $\rho_p$ ), in agreement with the analytical “feature-binding”  
338 model of Fig. 4e. Different configurations of local recurrent excitatory connectivity  
339 produced by “like-to-like” or “feature-binding” rules can therefore be detected in  
340 large networks, by comparing responses to simple and compound stimuli.

341 Consistent with our analytical models, networks including only random excitatory  
342 connectivity without any specificity did not give rise to decorrelation (Fig. S2b;  
343  $R^2=0.72$  between  $\rho_g$  and  $\rho_p$ ). This shows that decorrelation between plaid and  
344 grating responses in our models does not arise simply due to random connectivity,  
345 but requires the active mechanism of selective amplification through feature-  
346 binding subnetwork connectivity.

347 Inhibitory responses were untuned in our simulations (blue traces in Fig. 5a, c), in  
348 agreement with experimental observations of poorly-tuned inhibition in  
349 mouse V1 [46,51–53].

350 **Visual responses in mouse V1 are consistent with “feature-binding”**  
351 **connection rules**

352 Our analytical network results show that in principle the configuration of local  
353 excitatory connectivity, whether aligned with or spanning across feedforward  
354 visual properties, has a strong effect on visual representations (Fig.4). Our large-  
355 scale simulations show that these effects can be detected in large networks as  
356 differences in the pairwise correlations of responses to simple and compound  
357 visual stimuli (Fig.5). We therefore aimed to test which connectivity scheme is  
358 more likely to be present in visual cortex, by examining responses of neurons in  
359 mouse V1.

360 Using two-photon calcium imaging, we recorded responses of populations of  
361 OGB-labelled neurons in mouse V1 to a set of contrast-oscillating oriented grat-  
362 ing stimuli over a range of orientations, as well as the responses to the set of plaid  
363 stimuli composed of every possible pair-wise combination of the oriented grating  
364 stimuli (Fig. 6a; 5 animals, 5 sessions, 313/543 responsive/imaged neurons; see  
365 Methods). Responses to plaid stimuli in mouse V1 suggest that stimulating with a  
366 denser sampling of compound stimulus space leads to a better characterisation of  
367 response selectivity (Fig.2). Accordingly, we probed responses in mouse V1 under  
368 stimuli analogous to those used in the model simulations, with a dense coverage  
369 of plaid combinations over a set of finely-varying grating orientations.

370 \*\*\*\*\* FIGURE 6 NEAR HERE \*\*\*\*\*

371 We found that consistent with our earlier findings examining 90° drifting plaid  
372 stimuli [30], responses to grating stimuli did not well predict responses to plaid  
373 stimuli. Pairs of neurons with similar preferred orientation but with highly differ-  
374 ing responses to plaid stimuli were common (Fig. 6b–c;  $R^2=0.05$  between  $\rho_g$  and  
375  $\rho_p$ ; OSI > 0.3). The degree of decorrelation we observed in mouse V1 was consider-  
376 ably higher than predicted by the “like-to-like” model, and was more consistent  
377 with the “feature-binding” model (Fig. 6e).

378 Decorrelation induced by plaid responses and the lack of a relationship between  
379 grating and plaid responses in mouse V1 were not a result of unreliable or noisy  
380 responses *in vivo*. We included in our analysis only neurons that were highly reli-  
381 able, and responded significantly more strongly than the surrounding neuropil  
382 (see Methods). As a further control, we used experimentally recorded responses to  
383 grating stimuli to generate synthetic plaid responses for mouse V1 that would  
384 result from a cortex with like-to-like subnetwork connectivity (Fig. 6d, inset; see  
385 Methods). Our control data were generated from single-trial responses of single  
386 V1 neurons, and therefore included the same trial-to-trial variability exhibited by  
387 cortex. This control analysis indicates that a “like-to-like” rule among V1 neurons  
388 would result in a higher correlation of grating and plaid responses than experi-  
389 mentally observed (Fig. 6d; median  $R^2 = 0.77 \pm [0.767 \ 0.775]$  between  $\rho_g$  and  $\rho_p$ ;  
390  $n = 2000$  bootstrap samples; compared with  $R^2 = 0.05$  for experimental results;  
391  $p < 0.005$ , Monte-Carlo test).

392 Importantly, this control analysis is not restricted to our “like-to-like” rule, but  
393 makes similar predictions of highly correlated grating and plaid responses for any  
394 arbitrary model that combines grating components to produce a plaid response, as  
395 long as that rule is identical for every neuron in the network [30]. This is because  
396 if a single consistently-applied rule exists, then any pair of neurons with similar  
397 grating responses (high  $\rho_g$ ) will also exhibit similar plaid responses (high  $\rho_p$ ). In  
398 contrast, neurons that are connected within the “feature-binding” model combine  
399 different sets of grating components, depending on which subnetwork the neur-  
400 ons are members of.

401 Neurons in mouse V1 exhibited a wide range of facilitatory and suppressive  
402 responses to plaid stimuli, roughly equally split between facilitation and suppres-  
403 sion (Fig. 6f–g; 45% vs 42%;  $MI > 0.05$  and  $MI < -0.05$ ). The proportion of facilitat-  
404 ing and suppressing neurons in mouse V1 was similar to that exhibited by  
405 responsive neurons in our “feature-binding” model (Fig. 6g; V1 versus F.B.,  $p = 0.17$ ;  
406 two-tailed Fisher’s exact test,  $n_{V1} = 313$ ,  $n_{F.B.} = 809$ ). In contrast, neither the “like-to-  
407 like” model (L-to-L) nor a model with random non-specific connectivity (Rnd)  
408 exhibited significant facilitation in responsive neurons, and both were significantly  
409 different from the distribution of facilitation and suppression in mouse V1

410 (Fig. 6g;  $p < 0.001$  in both cases; two-tailed Fisher's exact test,  $n_{L-to-L} = 729$ ,  
411  $n_{Rnd} = 729$ ). The wide range of facilitatory and suppressive responses observed in  
412 mouse V1 is more consistent with a feature-binding rule for local connectivity,  
413 compared with a like-to-like rule or random non-specific connectivity.

## 414 Discussion

415 Whereas feedforward mechanisms for building response properties in visual net-  
416 works have been extensively studied, it is not well understood how visual  
417 responses are shaped by local recurrent connections. We hypothesised that the  
418 configuration of local recurrent cortical connectivity shapes responses to visual  
419 stimuli in mouse V1, and examined two alternative scenarios for local connection  
420 rules: essentially, whether local excitatory connections are made in accordance  
421 with feedforward visual properties ("like-to-like"; Fig. 1a), or whether local excit-  
422 atory connections span across feedforward visual properties to group them ("fea-  
423 ture-binding"; Fig. 1b). We found that highly selective and facilitatory responses  
424 to plaid stimuli observed in mouse V1 (Fig. 2, Fig. 6; [30]) are consistent with  
425 tuning of recurrent connections within small cohorts of neurons to particular  
426 combinations of preferred orientations. Moreover, responses in mouse V1 are  
427 inconsistent with a simple configuration of cortical connections strictly aligned  
428 with feedforward visual responses.

## 429 **Amplification and competition might underlie facilitation and** 430 **suppression**

431 Our theoretical analysis and simulation results demonstrate that non-random  
432 excitatory connectivity affects the computational properties of a cortical network  
433 by introducing amplification of responses within subnetworks of excitatory neur-  
434 ons, and competition in responses between subnetworks (Fig. 4a-c). Several recent  
435 studies have demonstrated that visual input is amplified within the superficial  
436 layers of cortex [54-56], and recent results from motor cortex suggest competition  
437 between ensembles of neurons [57]. Our modelling results indicated that some  
438 form of non-random local excitatory connectivity is required for such amplifica-



439 tion to occur through recurrent network interactions, with reasonable assumptions  
440 for anatomical and physiological parameters for rodent cortex (Fig. 4a–c; Fig. S1).  
441 This still leaves in question whether the *particular configuration* of non-random  
442 excitatory connectivity plays a role.

443 Our simulation results showed that the effects of amplification and competition  
444 on cortical responses are tuned to the statistics of local connectivity. This implies  
445 that stimuli matching the statistics of a subnetwork will undergo stronger ampli-  
446 fication than non-matching stimuli (Fig. 7). In our “feature-binding” model, the  
447 statistics of subnetwork connectivity were similar to plaid stimuli composed of  
448 two grating components. As a result, plaid stimuli gave rise to stronger amplifica-  
449 tion than single grating components alone, when the composition of the plaid  
450 matched the composition of connectivity within a particular subnetwork. This led  
451 to a facilitatory effect, where some neurons responded more strongly to plaid  
452 stimuli than to the grating components underlying the plaid stimuli. Conversely,  
453 competition between subnetworks led to weaker responses to some plaid stimuli,  
454 for neurons that “lost” the competition. Competition could therefore be one cor-  
455 tical mechanism underlying cross-orientation suppression in response to plaid  
456 stimulation.

457 \*\*\* FIGURE 7 NEAR HERE \*\*\*

458 In contrast, suppression in the “like-to-like” and “random” models occur because  
459 the energy in the stimulus is spread across two grating components, and is not  
460 combined by the network to form strong plaid selectivity. In the “like-to-like”  
461 model, competition occurs between representations of the two oriented grating  
462 components of the plaid, causing additional suppression. The presence of ampli-  
463 fied, strongly facilitating plaid responses in mouse V1 is therefore consistent with  
464 the existence of subnetworks representing the conjunction of differently-oriented  
465 edges.

## 466 **Detecting feature-binding connectivity rules in cortex**

467 We found that the precise rules that determine local connections among neurons  
468 in cortex can strongly affect the representation of visual stimuli. The “feature-  
469 binding” rule we examined embodies the simplest second-order relationship  
470 between connectivity and preferred orientation, and was chosen for this reason.  
471 We cannot rule out more complicated connectivity rules as being present in  
472 mouse V1, but we have shown that a simple “like-to-like” rule cannot explain  
473 responses to plaid visual stimuli. Random, non-specific connections were also  
474 unable to explain complex plaid responses in mouse V1 (Fig. S2).

475 How can the detailed statistics of “feature-binding” rules be measured in cortex?  
476 Existing experimental techniques have been used to measure only first-order  
477 statistical relationships between function and cortical connectivity [18,21-24,51].  
478 Unfortunately, current technical limitations make it difficult to measure more  
479 complex statistical structures such as present under a “feature-binding” connectiv-  
480 ity rule. Simultaneous whole-cell recordings are typically possible from only a  
481 small numbers of neurons, thus sparsely testing connectivity within a small  
482 cohort. Even if simultaneous recordings of up to 12 neurons are used [17], identi-  
483 fying and quantifying higher-order statistics in the local connectivity pattern is  
484 limited by the low probability of finding connected excitatory neurons in cortex.

485 In addition, our results highlight that small changes in the statistics of local con-  
486 nectivity can have drastic effects on computation and visual coding. Introducing a  
487 small degree of specificity, such that a minority of synapses are made within an  
488 excitatory subnetwork, is sufficient to induce strong specific amplification and  
489 strong competition to the network, even though a majority of the synapses are  
490 made randomly (Fig. 4a-c). Under our “feature-binding” model 68% of synapses  
491 are made randomly; approximately 21% are made under a “like-to-like” rule and  
492 the remaining 11% are used to bind visual features. Clearly, detecting the small  
493 proportion of synapses required to implement feature binding in V1 will be diffi-  
494 cult, using random anatomical sampling techniques.

495 A recent study functionally characterised the presynaptic inputs to single superfi-  
496 cial-layer neurons in mouse V1, using a novel pre-synaptic labelling technique  
497 [58]. Consistent with our results for preferred orientation (Fig. 3f, g), they found  
498 that presynaptic inputs were similarly tuned as target neurons but over a wide  
499 bandwidth. The majority of synaptically connected networks were tuned for mul-  
500 tiple orientation preferences across cortical layers, similar to the feature-binding  
501 networks in our study.

502 We implemented an alternative approach, by inferring the presence of higher-  
503 order connectivity statistics from population responses in cortex. This technique  
504 could be expanded experimentally, by presenting a parameterised battery of simple  
505 and complex stimuli. Stimuli close to the configuration of local connectivity rules  
506 would lead to maximal facilitation and competition within the cortical network.  
507 Importantly, our results strongly suggest that simple stimuli alone are insufficient  
508 to accurately characterise neuronal response properties in visual cortex.

## 509 **Building plaid responses from convergence of simple feedforward** 510 **inputs**

511 Could the complexity of plaid texture responses in mouse V1 be explained by con-  
512 vergence of differently tuned feedforward inputs from layer 4 onto single layer 2/3  
513 neurons, similar to the proposed generation of pattern-selective responses in  
514 primate MT [33,59]? Building plaid responses in this way would imply that layer  
515 2/3 neurons would respond to multiple grating orientations, since they would  
516 receive approximately equal inputs from at least two oriented components. How-  
517 ever, layer 4 and layer 2/3 neurons are similarly tuned to orientation in rodent V1  
518 [60,61], in conflict with this feedforward hypothesis.

519 In addition, if responses to complex stimuli were built by feedforward combina-  
520 tion of simple grating components, then the response of a neuron to the set of  
521 grating stimuli would directly predict the plaid response of that neuron. This  
522 would then imply that two neurons with similar responses to plaid stimuli must

523 have similar responses to grating stimuli. However we found this not to be the  
524 case; two neurons with similar responses to grating components often respond  
525 differently to plaid textures or to natural scenes (Fig. 3d; Fig. 6a, b; [30]).

## 526 **Computational role of inhibitory connectivity and physiology**

527 Non-specific connectivity between excitatory and inhibitory neurons, as assumed  
528 in our simulation models, is consistent with the concept that inhibitory neurons  
529 simply integrate neuronal responses in the surrounding population [62], and is  
530 also consistent with experimental observations of weakly tuned or untuned inhib-  
531 ition in rodent visual cortex [41,46,51-53]. Although specific  $E \leftrightarrow I$  connectivity has  
532 been observed in rodent cortex [16,28], the majority of  $E \leftrightarrow I$  synapses are likely to  
533 be made functionally non-specifically in line with the high convergence of  $E \rightarrow I$   
534 and  $I \rightarrow E$  connections observed in cortex [51,52,63].

535 In our models, shared inhibition is crucial to mediate competition between excit-  
536 atory subnetworks (Fig. 4); inhibition is untuned because excitatory inputs to the  
537 inhibitory population are pooled across subnetworks. Poorly tuned inhibition, as  
538 expressed by the dominant class of cortical inhibitory neurons (parvalbumin  
539 expressing neurons), therefore plays an important computational role and is not  
540 merely a stabilising force in cortex.

541 Other inhibitory neuron classes in cortex (e.g. somatostatin or vaso-intestinal  
542 peptide expressing neurons) have been shown to exhibit feature-selective  
543 responses [46,64,65]. Recent computational work examined the influence of mul-  
544 tiple inhibitory neuron classes with different physiological and anatomical tuning  
545 properties in a model for rodent cortex [66]. They examined the role of inhibitory  
546 connectivity on divisive and subtractive normalisation of network activity in a net-  
547 work with specific, orientation-tuned inhibitory connectivity. They found that  
548 specific inhibitory feedback could lead to divisive normalisation of network activ-  
549 ity, while non-specific inhibitory feedback could lead to subtractive normalisation.

550 However, the computational role of specific inhibition is likely to rest on the pre-  
551 cise rules for connectivity expressed between excitatory and inhibitory neurons. If  
552 the rules for  $E \leftrightarrow E$  and  $E \leftrightarrow I$  connections align, then a specific inhibitory popula-  
553 tion could act as a break on excitation within a subnetwork, and could allow more  
554 specific anatomical connectivity to persist while maintaining the balance between  
555 excitation and inhibition in cortex. The functional profile of this balancing pool  
556 would be highly tuned, and be similar to that of the excitatory neurons in the sub-  
557 network, suggesting a physiological signature of specific inhibitory feedback that  
558 could be sought experimentally. Alternatively, if  $E \leftrightarrow I$  connection rules result in  
559 counter-tuned specificity, these connections would act to strengthen competition  
560 between subnetworks.

## 561 **Feature binding to detect higher-order visual statistics**

562 In visual cortex of primates, carnivores and rodents, orientation tuning develops  
563 before postnatal eye opening and in the absence of visual experience [67,68].  
564 Local recurrent connections develop after the onset of visual experience and  
565 maintain their plasticity into adulthood [67,69-73]. Statistical correlations in nat-  
566 ural scenes might therefore lead to wiring of subnetworks under an activity-  
567 dependent mechanism such as spike-time dependent plasticity (STDP) [74-78].  
568 Along these lines, examinations of the development of specific excitatory connec-  
569 tions after eye opening found that similarities in feedforward input were progress-  
570 ively encoded in specific excitatory connections [22].

571 We expect that, as the specificity of lateral connections forms during develop-  
572 ment, the emergence of compound feature selectivity will gradually occur after the  
573 onset of sensory experience. This hypothesis is consistent with experience-  
574 dependent development of modulatory effects due to natural visual stimulation  
575 outside of the classical receptive field, as has been observed in mouse V1 [79].  
576 While a complete factorial combination of all possible features occurring in nat-  
577 ural vision is clearly not possible, presumably the most prominent statistical fea-  
578 tures of cortical activity patterns would be prioritised for embedding through  
579 recurrent excitatory connectivity. At the same time, competition induced by non-

580 specific shared inhibition will encourage the separation of neurons into subnet-  
581 works. In our interpretation, single subnetworks would embed learned relation-  
582 ships between external stimulus features into functional ensembles in cortex, such  
583 that they could be recovered by the competitive mechanisms we have detailed.

584 In pre-frontal cortex, compound or mixed selectivity of single neurons to com-  
585 binations of task-related responses, facilitating efficient decoding of arbitrary  
586 decision-related variables, has been found in several studies [80,81]. Binding feed-  
587 forward cortical inputs into compound representations, as occurs in our “feature-  
588 binding” model, is therefore a useful computational process with general applicab-  
589 ility. We propose that specific local excitatory connectivity is a general circuit  
590 mechanism for shaping information processing in cortical networks.

## 591 Materials and Methods

### 592 In-vivo calcium imaging

593 Experimental procedures followed institutional guidelines and were approved by  
594 the Cantonal Veterinary Office in Zürich or the UK Home Office. Procedures for  
595 urethane anaesthesia, craniotomies, bulk loading of the calcium indicator, as well  
596 as for *in vivo* two-photon calcium imaging and *in vitro* recording of synaptic con-  
597 nection strength were the same as described previously [24,30,82,83].

598 ***Preparation and imaging with OGB*** Male and female three-month old wild  
599 type C7BL/6 mice were sedated with chlorprothixene (10 mg/ml in Ringer solu-  
600 tion; 0.01 ml per 20 g by weight) then anaesthetised with urethane (10% in iso-  
601 tonic saline; initial dose 0.1 ml per 20 g by weight; supplemented as required to  
602 maintain anaesthesia). The body temperature of anaesthetised animals was mon-  
603 itored and controlled using a heating pad and rectal thermometer. Atropine was  
604 given to reduce secretions (0.16 ml per 20 g by weight). Intrinsic optical imaging  
605 was used to locate primary visual cortex, and a craniotomy was made over V1.

606 We performed bulk loading of the synthetic calcium indicator Oregon Green-  
607 BAPTA-1 (OGB-1; Invitrogen). Several acute injections of OGB-1-AM were  
608 made under visual guidance into the visual cortex [84]. Sulforhodamine (SR-101;  
609 Invitrogen) was applied topically to the pial surface, to provide labelling of the  
610 astrocytic network [85]. Time-series stacks recording activity in layer 2/3 cortical  
611 neurons were acquired at a 4–10 Hz frame rate with a custom-built microscope  
612 equipped with a 40× objective (LUMPlanFI/IR, NA 0.8; Olympus) and an  
613 80 MHz pulsed Ti:Sapphire excitation laser (MaiTai HP; Spectra Physics, New-  
614 port). Acquisition of calcium transients was performed using custom-written  
615 software in LabView (National Instruments), and analysis was performed using  
616 the open-source FocusStack toolbox [86].

617 ***Preparation and imaging with GCaMP6*** Adult male mice (P75–P90) were ini-  
618 tially anaesthetized with 4–5% isoflurane in O<sub>2</sub> and maintained on 1.5–2% during  
619 the surgical procedure. The primary visual cortex (V1) was localized using intrinsic

620 imaging. Briefly, the skull above the estimated location of V1 was thinned and we  
621 illuminated the cortical surface with 630 nm LED light, presented drifting grat-  
622 ings for 5 s, and collected reflectance images through a 4× objective with a CCD  
623 camera (Toshiba TELI CS3960DCL).

624 A craniotomy of 3–4 mm was opened above the region of strongest intrinsic signal  
625 response, which we assumed to be centred over V1. We then injected the genetic-  
626 ally encoded calcium indicator GCaMP6m [87]  
627 (AAV1.Syn.GCaMP6m.WPRE.SV40; UPenn) around 250 μm below the cortical  
628 surface to target superficial layer neurons. 2–3 injections were made in a single  
629 animal and a volume of approximately 200 nl was injected at each location. The  
630 craniotomy was sealed with a glass window and a metal post for head fixation was  
631 implanted on the skull with dental acrylic, contralateral to the cranial window.

632 For imaging, animals were anaesthetised with isoflurane at 4% for induction, then  
633 head fixed. Isoflurane concentration was lowered to 0.5–0.75% during the experi-  
634 ment. We maintained the animal's body temperature at 37°C using a rectal ther-  
635 mometer probe and a heating pad placed under the animal. Silicon oil was applied  
636 to the eyes to keep them moist.

637 *In vivo/in vitro characterisation of function and connectivity* Methods for  
638 obtaining visual responses *in vivo* and measuring synaptic connectivity *in vitro* are  
639 described in [24]. Briefly, young C75/BL6 mice (P22–26) were anaesthetised  
640 (fentanyl, midazolam and medetomidine) and injected with OGB calcium indic-  
641 ators, lightly anaesthetised with isoflurane (0.3–0.5%) and head fixed. Two-  
642 photon imaging of calcium responses was used to record the response of neurons  
643 to a sequence of natural images (1800 individual images). After *in vivo* imaging  
644 experiments, simultaneous whole-cell recordings of up to six neurons at a time  
645 were performed *in vitro*. Evoked spikes and recorded EPSPs were used to identify  
646 synaptically connected pairs of neurons.



## 647 **Visual stimulation**

648 Visual stimuli for receptive field characterisation, drifting gratings and plaids and  
649 masked natural movies were provided by an LCD monitor (52.5×29.5 cm; BenQ)  
650 placed 10–11 cm from the eye of the animal and covering approximately 135×107  
651 visual degrees (v.d.). The monitor was calibrated to have a linear intensity response  
652 curve. Contrast-oscillating grating and plaid stimuli were presented on an LCD  
653 monitor (15.2×9.1 cm; Xenarc) placed 9 cm from the eye of the animal and cover-  
654 ing 80×54 v.d. The same screen was used for stimulus presentation during intrinsic  
655 imaging to locate visual cortex and during two-photon imaging. The open-source  
656 StimServer toolbox was used to generate and present visual stimuli via the  
657 Psychtoolbox package [86,88].

658 Stimuli for receptive field characterisation comprised a 5×5 array of masked high  
659 contrast drifting gratings (15 v.d. wide; overlapping by 40%; 9 v.d. per cycle; 1 Hz  
660 drift rate; 0.5 Hz rotation rate) presented for 2 s each in random order, separated  
661 by a blank screen of 2 s duration, with 50% luminance (example calcium response  
662 shown in Fig. 3a). Full-field high-contrast drifting gratings (33.33 v.d. per cycle;  
663 1 Hz drift rate) were presented drifting in one of 8 directions for 2 s each in  
664 random order, separated by a 6 s period of blank screen with 50% luminance  
665 (example calcium response shown in Fig. 3b). Full-field 50% contrast drifting  
666 gratings (25 v.d. per cycle; 1 Hz drift rate) were presented drifting in one of 16 dir-  
667 ections for 1 s each in random order (calcium responses shown in Fig. 2). Full-field  
668 drifting plaid stimuli were constructed additively from 50% contrast grating com-  
669 ponents (25 v.d. per cycle; 1 Hz drift rate; 1 s duration; Fig. 2). Full-field natural  
670 movies consisted of a 43 s continuous sequence with three segments (example cal-  
671 cium response shown in Fig. 3c). Full-field contrast-oscillating gratings and plaid  
672 stimuli were composed of bars of 8 v.d. width which oscillated at 2 Hz between  
673 black and white on a 50% grey background, and with a spatial frequency of  
674 20 v.d./cycle (example calcium response shown in Fig. 6a). On each subsequent  
675 oscillation cycle the bars locations shifted phase by 180°. Static gratings were used  
676 to avoid introducing a movement component into the stimulus. A base orienta-  
677 tion for the gratings of either horizontal or vertical was chosen, and five orienta-  
678 tions spanning ±40 deg. around the base orientation were used. Contrast-oscillat-

679 ing plaids were composed of every possible combination of the five oscillating  
680 grating stimuli, giving 5 grating and 10 plaid stimuli for each experiment. A single  
681 trial consisted of a blank period (50% luminance screen) presented for 10 s, as well  
682 as presentations of each of the gratings and plaids for 5 s each, preceded by 5 s of a  
683 blank 50% luminance screen, all presented in random order.

## 684 **Analysis of calcium transients**

685 Analysis of two-photon calcium imaging data was conducted in Matlab using the  
686 open-source FocusStack toolbox [86]. During acquisition, individual two-photon  
687 imaging trials were visually inspected for Z-axis shifts of the focal plane. Affected  
688 trials were discarded, and the focal plane was manually shifted to align with previ-  
689 ous trials before acquisition continued. Frames recorded from a single region were  
690 composed into stacks, and spatially registered with the first frame in the stack to  
691 correct lateral shifts caused by movement of the animal. Only pixels for which  
692 data was available for every frame in the stack were included for analysis. A back-  
693 ground fluorescence region was selected in the imaged area, such as the interior of  
694 a blood vessel, and the spatial average of this region was subtracted from each  
695 frame in the stack. The baseline fluorescence distribution for each pixel was estim-  
696 ated by finding the mean and standard deviation of pixel values during the 10 s  
697 blank periods, separately for each trial. Regions of interest (ROIs) were selected  
698 either manually, or by performing low-pass filtering of the OGB (green) and  
699 sulforhodamine (red) channels, subtracting red from green and finding the local  
700 peaks of the resulting image.

701 A general threshold for responsivity was computed to ensure that ROIs con-  
702 sidered responsive were not simply due to neuropil activity. The responses of all  
703 pixels outside any ROI were collected (defined as “neuropil”), and the Z-scores of  
704 the mean  $\Delta F/F_0$  responses during single visual stimulus presentations were com-  
705 puted per pixel, against the 10 s baseline period. A threshold for single-trial  
706 responses to be deemed significant ( $z_{\text{trial}}$ ) was set by finding the Z-score which  
707 would include only 1% of neuropil responses ( $\alpha=1\%$ ). A similar threshold was set  
708 for comparison against the strongest response of an ROI, averaged over all trials

709 ( $z_{\max}$ ). These thresholds always exceeded 3, implying that single-trial responses  
710 included for further analysis were at least 3 standard deviations higher than the  
711 neuropil response. Note that this approach does not attempt to subtract neuropil  
712 activity, but ensures that any ROI used for analysis responds to visual stimuli with  
713 calcium transients that can not be explained by neuropil contamination alone.

714 The response of a ROI to a stimulus was found on a trial-by-trial basis by first  
715 computing the spatial average of the pixels in a ROI for each frame. The mean of  
716 the frames during the blank period preceding each trial was subtracted and used  
717 to normalise responses ( $\Delta F/F_0$ ), and the mean  $\Delta F/F_0$  of the frames during the  
718 trial was computed. The standard deviation for the baseline of a neuron was  
719 estimated over all  $\Delta F/F_0$  frames from the long baseline period and the pre-trial  
720 blank periods. ROIs were included for further analysis if the ROI was visually  
721 responsive according to trial Z-scores (maximum response  $> z_{\max}$ ) and reliable  
722 (trial response  $> z_{\text{trial}}$  for more than half of the trials). The response of a neuron to a  
723 stimulus was taken as the average of all single-trial  $\Delta F/F_0$  responses.

724 Receptive fields of neurons recorded under natural movie and drifting grating  
725 stimulation were characterised by presenting small, masked high-contrast drifting  
726 gratings from a  $5 \times 5$  array, in random order (see above; Fig.3a). A receptive field  
727 for each neuron was estimated by a Gaussian mixture model, composed of circu-  
728 larly symmetric Gaussian fields ( $\rho = 7.5$  v.d.) placed at each stimulus location and  
729 weighted by the response of the neuron to the grating stimulus at that location.  
730 The centre of the receptive field was taken as the peak of the final Gaussian mix-  
731 ture. Neurons were included for further analysis if the centre of their receptive  
732 field lay within a 7.5 v.d. circle placed at the centre of the natural movie visual  
733 stimulus. Example single-trial and trial-averaged calcium responses to natural  
734 movie stimuli are shown in Fig.3c.

## 735 **Response similarity measures and response metrics**

736 The similarity in response between two neurons was measured independently for  
737 grating and plaid stimuli. The set of grating responses for each neuron were com-  
738 posed into vectors  $R1_g$  and  $R2_g$ . Similarity in grating response was then given

739 by the Pearson's correlation coefficient between  $R1_g$  and  $R2_g$ :  
740  $\rho_g = \text{corr}(R1_g, R2_g)$  (see Fig. 3b, inset). The similarity in response to plaid stimuli  
741 was computed analogously over the sets of plaid responses  $R1_p$  and  $R2_p$ :  
742  $\rho_p = \text{corr}(R1_p, R2_p)$  (see Fig. 6a, inset). Similarity was only measured between  
743 neurons recorded in the same imaging site.

744 The similarity between neurons in their responses to movie stimuli ( $\rho_m$ ) was  
745 measured by computing the signal correlation as follows. The calcium response  
746 traces for a pair of neurons were averaged over trials. The initial 1s segment of the  
747 traces following the onset of a movie segment were excluded from analysis, to  
748 reduce the effect of transient signals in response to visual stimulus onset on ana-  
749 lysed responses. The Pearson's correlation coefficient was then calculated between  
750 the resulting pair of traces ( $\rho_m$ ; see Fig. 3c, inset). Note that correlations intro-  
751 duced through neuropil contamination were not corrected for, with the result that  
752 the mean signal correlation is positive rather than zero. For this reason we used  
753 thresholds for "high" correlations based on percentiles of the correlation distribu-  
754 tion, rather than an absolute correlation value.

755 The similarity between neurons in their responses to flashed natural stimuli ( $\rho_{Ca}$ ;  
756 Fig. 3f) was measured as the linear correlation between the vector of responses of  
757 a single neuron to a set of 1800 natural stimuli [24].

758 The Orientation Selectivity Index (OSI) of a neuron was estimated using the for-  
759 mula  $OSI = [\max(R_g) - \min(R_g)] / \text{sum}(R_g)$ , where  $R_g$  is the set of responses of a  
760 single neuron to the set of grating stimuli.

761 The Plaid Selectivity Index (PSI) of a neuron, describing how selective a neuron is  
762 over a set of plaid stimuli, was calculated using the formula  
763  $PSI = 1 - [-1 + \sum_j R_{p,j} / \max(R_p)] / [\#(R_p) - 1]$ , where  $\#(R_p)$  is the number of  
764 stimuli in  $R_p$  [30]. The PSI of a neuron ranges from 0 to 1, where a value of 1  
765 indicates a highly selective response, where a neuron responds to only a single  
766 stimulus; a value of 0 indicates equal, nonselective responses to all stimuli.

767 A plaid Modulation Index (MI), describing the degree of facilitation or suppres-  
768 sion of a neuron in response to plaid stimuli, was calculated using the formula  
769  $MI = \left[ \max(R_p) - \max(R_g) \right] / \left[ \max(R_p) + \max(R_g) \right]$ , where  $R_p$  is the set of  
770 responses of a single neuron to the set of plaid stimuli [30]. The MI of a neuron  
771 ranges from -1 to 1. Values of  $MI < 0$  indicate stronger responses to grating stimuli  
772 compared with plaid stimuli; values of  $MI > 0$  indicate stronger responses to plaid  
773 stimuli. A value of  $MI = -1$  indicates that a neuron responds only to grating stim-  
774 uli; a value of  $MI = 1$  indicates that a neuron responses to only plaid stimuli.

775 The proportion of facilitating and suppressing neurons was compared between  
776 mouse V1 and model responses using two-tailed Fisher's exact tests. The popula-  
777 tion of responsive neurons was divided into three groups: facilitating ( $MI > 0.05$ );  
778 suppressing ( $MI < -0.05$ ); and non-modulated ( $-0.05 \leq MI \leq 0.05$ ). These cat-  
779 egories were arranged into three  $2 \times 3$  contingency tables, with each table tested to  
780 compare facilitation and suppression between mouse V1 and one model.

## 781 **Generation of V1 control responses**

782 We used single-cell, single-trial responses to oscillating contrast grating stimuli to  
783 explore whether we could distinguish between correlated and decorrelated  
784 responses to plaid stimuli, given experimental variability and noise. For each cell  
785 in the experimentally-recorded data set, we used the set of grating responses  $R_g$  to  
786 generate plaid responses  $R_p$  for the same cell, under the assumption that the  
787 response to a plaid was linearly related to the sum of the responses to the two  
788 grating components. For each plaid, we randomly selected a single-trial response  
789 for each of the grating components of the plaid. The predicted single-trial plaid  
790 response was the sum of the two grating responses. We generated 100 bootstrap  
791 samples for each experimental population, with each sample consisting of the  
792 same number of trials and neurons as the experimental population. We then  
793 quantified the relationship between grating and plaid responses as described for  
794 the experimental data.

## 795 Models of mouse V1

796 We designed a model of the superficial layers of mouse primary visual cortex, to  
797 explore the effect of different connectivity rules on information processing within  
798 the cortex. A simple version of this model, comprising only five neurons with  
799 mean-field connectivity, was used for analytical exploration (“analytical model”;  
800 Fig. 4, Fig. S1, Fig. 7). A large-scale version, comprising 80,000 neurons with  
801 sparse connectivity, was used for direct comparison with experimental results  
802 (Fig. 5–6). A full list of parameters for both models is given in Table 1.

803 **Common model dynamics** Individual excitatory neurons (approximating layer 2/3  
804 pyramidal cells) and inhibitory neurons (approximating layer 2/3 basket cells)  
805 were modelled as linear-threshold units, with equal time constants and thresholds  
806 set to zero. The dynamics of each rate-coded neuron in the large- and small-scale  
807 models was governed by the differential equation

$$808 \tau_i \dot{x}_i = -x_i + \sum_j^{N_N} w_{i,j} [x_j - \beta_j]^+ + I_i(t) + \sigma_i \zeta_i(t), \quad (1)$$

809 where  $\tau_i$  is the time constant of neuron  $i$ ;  $x_i$  is the instantaneous current being  
810 injected into neuron  $i$ ;  $[x]^+$  denotes the linear-threshold transfer function  
811  $[x]^+ = \max(x, 0)$ ;  $\beta_j$  is the activation threshold of neuron  $j$ ;  $I_i(t)$  is the stimulus  
812 input current provided to neuron  $i$  at time  $t$ ;  $\sigma_i \zeta_i(t)$  is a white noise process  
813 included to approximate the barrage of spontaneous E- and I-PSPs experienced  
814 by cortical neurons; and  $N_N$  is the total number of neurons in the model. The  
815 total directed connection strength between two neurons  $j$  and  $i$  is given in Eq. (1)  
816 by  $w_{i,j} = g_j \cdot n_{i,j} \cdot \alpha_j$ , where  $g_j$  is the charge injected by a synapse from neuron  $j$  to  
817 neuron  $i$  and  $n_{i,j}$  is the number of synapses made by neuron  $j$  onto neuron  $i$ ;  $\alpha_j$   
818 is the gain of neuron  $j$ .

819 **Synaptic input** Synapses were modelled as constant current sources that injected  
820 an amount of charge per second related to the average firing rate of the presyn-  
821 aptic neuron, modulated by the synaptic release probability. Single excitatory syn-  
822 apses were assigned a weight of 0.01 pC/spike/synapse; single inhibitory syn-  
823 apses were considered to be 10 times stronger [4]. Excitatory and inhibitory  
824 neurons were assigned output gains of 0.066 spikes/pC [89].

825 **Analytical model** To explore the basic stability and computational consequences  
 826 of non-random excitatory connectivity, we built a small five-node model (four  
 827 excitatory and one inhibitory neuron; Fig. 4). Connections within this model were  
 828 defined to approximate the average expected connectivity between populations of  
 829 neurons in layers 2/3 of mouse V1. Excitatory neurons were grouped into two sub-  
 830 networks, and a proportion  $s$  of synapses from each excitatory neurons was  
 831 reserved to be made within the same subnetwork. When  $s=0$ , E $\leftrightarrow$ E synapses  
 832 were considered to be made randomly, such that each connection in the small  
 833 model approximated the average total connection strength expected in mouse V1.  
 834 When  $s=1$ , all E $\leftrightarrow$ E synapses were considered to be specific within the same sub-  
 835 network, such that no synapses were made between excitatory neurons in different  
 836 subnetworks. Connections to and from the inhibitory node were considered to be  
 837 made randomly in every case. The resulting weight matrix for this network is  
 838 therefore given by

$$839 \quad W = \begin{bmatrix} a & a & b & b & -w_{ie} \\ a & a & b & b & -w_{ie} \\ b & b & a & a & -w_{ie} \\ b & b & a & a & -w_{ie} \\ w_{ei} & w_{ei} & w_{ei} & w_{ei} & -w_I \cdot f_I \end{bmatrix}, \text{ where} \quad (2)$$

840  $a = w_S/2 + w_N/4$  is the excitatory weight between neurons in the same subnet-  
 841 work;  $b = w_N/4$  is the excitatory weight between neurons in different subnet-  
 842 works;  $w_{ie} = w_I \cdot (1 - f_I)/4$  is the nonspecific inhibitory to excitatory feedback  
 843 weight;  $w_{ei} = w_E \cdot f_I$  is the nonspecific excitatory to inhibitory weight;  
 844  $w_S = w_E \cdot (1 - f_I) \cdot s$  is the specific weight component,  $w_N = w_E \cdot (1 - f_I) \cdot (1 - s)$  is  
 845 the nonspecific weight component,  $w_E$  is the total synaptic weight from a single  
 846 excitatory neuron,  $w_I$  is the total synaptic weight from a single inhibitory neuron  
 847 and  $f_I = 1/5$  is the proportion of inhibitory neurons. Preferred orientations for  
 848 each excitatory neuron are indicated in Fig. 4. When a stimulus matched the pre-  
 849 ferred orientation of a neuron, a constant input current was injected ( $I_i(t) = \iota$ );  
 850 when a stimulus did not match the preferred orientation, no input current was  
 851 provided to that neuron ( $I_i(t) = 0$ ). When simulating the analytical model, the  
 852 input current  $\iota = 1$ .

853 ***Measuring stability and competition*** To determine network stability in the ana-  
854 lytical model, we performed an eigenvalue analysis of the system Jacobian, given  
855 by  $J = (W - I) ./ T$ , where  $W$  is the system weight matrix as given above,  $I$  is the  
856 identity matrix,  $T$  is the matrix composed of time constants for each post-synaptic  
857 neuron corresponding to elements in  $W$  and  $A ./ B$  indicates element-wise division  
858 between matrices  $A$  and  $B$ . The network was considered stable if all eigenvalues  
859 of  $J$  as well as the trace of the Jacobian  $\text{Tr}(J)$  were non-positive. The non-linear  
860 dynamical system was linearised about the fixed point where all neurons are  
861 active; if this fixed point is unstable then the system operates in either a hard  
862 winner-take-all mode if a different partition is stable, or is globally unstable  
863 [90,91]. Either of these modes is undesirable for cortex.

864 For a network to be in an ISN regime, the excitatory portion of the network must  
865 be unstable in the absence of inhibition, and inhibition must be strong enough in  
866 the full network to balance excitation. To determine whether the parameter  
867 regimes place the network in an inhibition-stabilised (ISN) regime, we therefore  
868 performed an eigenvalue analysis of the system in which all inhibitory connec-  
869 tions were removed (i.e.  $w_I = 0$ ). Either one eigenvalue of the corresponding Jac-  
870 obian  $J^E$  of the excitatory-only network or the system trace  $\text{Tr}(J^E)$  was required to  
871 be positive, but the system including inhibitory feedback was required to be  
872 stable.

873 The presence and strength of competition in Fig. 4 was determined by injecting  
874 current into a single excitatory neuron and recording the net current received by  
875 an excitatory neuron in the opposite subnetwork at the network fixed point (see  
876 Fig. 4a). Negative net currents correspond to competition between the stimulated  
877 and recorded excitatory neurons (shown as shading in Fig. S1).

878 ***Large-scale model*** To construct the large-scale simulation model of mouse V1,  
879 80,000 linear-threshold neurons were each assigned a random location  $\mathbf{u}_i \in \mathbb{T}^2$   
880 where  $\mathbb{T}$  defines the surface of a virtual torus of size  $2.2 \times 2.2$  mm. Excitatory and  
881 inhibitory neurons were placed with relative densities appropriate for layers 2  
882 and 3 of mouse cortex [92].



883 To determine patterns of synaptic connectivity, we calculated for each neuron the  
884 probability distribution of forming a synaptic connection with all other neurons  
885 in the model. A fixed number of synapses was drawn from this distribution; the  
886 number was chosen as an estimate of the number of synapses formed with other  
887 superficial layer neurons in rodent cortex (8142 from each excitatory and 8566  
888 from each inhibitory neuron; [1,92]). Since a simulation with the full density of  
889 cortical neurons was computationally infeasible, the size of the simulations was  
890 scaled to 10% of estimated cortical density. The sparsity of local synaptic con-  
891 nectivity was maintained by also scaling the number of synapses made by each  
892 neuron, while maintaining the total synaptic conductance formed by each neuron.

893 Axonal and dendritic densities for each neuron were described by a two-dimen-  
894 sional Gaussian field

$$895 \quad \mathcal{G}(\mathbf{v}, \mathbf{u}_i, \rho_i) = \exp\left(\frac{-\|\mathbf{v}, \mathbf{u}_i\|^2}{2\rho_i^2}\right), \quad (3)$$

896 where  $\rho_i$  is a field dispersion parameter associated with neuron  $i$  and  $\|\mathbf{v}, \mathbf{u}\|$  is the  
897 Euclidean distance between  $\mathbf{v}$  and  $\mathbf{u}$ , computed over the surface of a 2D torus. In  
898 our models, each neuron had a Gaussian dendritic field of  $\rho_d = 75 \mu\text{m}$  (correspond-  
899 ing to an approximate width of  $4\rho = 300 \mu\text{m}$ ; [93]); and axonal field of  
900  $\rho_{a,e} = 290 \mu\text{m}$  for excitatory neurons (width  $1100 \mu\text{m}$ ; [93-95]) and  $\rho_{a,i} = 100 \mu\text{m}$  for  
901 inhibitory neurons (width  $400 \mu\text{m}$ ; [96]).

902 **Anatomical connectivity rule** Our default rule for forming synapses was based  
903 on Peters' Rule, in that the probability of forming a synapse was proportional to  
904 the overlap between axonal and dendritic fields [2,8]. This was estimated by com-  
905 puting the integrated product of axonal and dendritic fields over a torus  $\mathbb{T}$ :

$$906 \quad p_{Peters} = \left\| \int \int_{\mathbb{T}} \mathcal{G}(\mathbf{v}, \mathbf{u}_i, \rho_{d,i}) \mathcal{G}(\mathbf{v}, \mathbf{u}_j, \rho_{a,j}) d\mathbf{v} \right\|, \quad (4)$$

907 where  $p_{Peters}$  is the probability of forming a single synapse between neurons  $i$   
908 and  $j$ , and the notation  $\|\dots\|$  indicates that the expression between the double  
909 brackets is normalised to form a probability density function, such that if summed  
910 across all possible target neurons the total will be equal to 1.

911 **Like-to-like connectivity rule** We investigated two rules for anatomical  
912 specificity in intra-cortical excitatory recurrent connections. The first such rule  
913 corresponds to the case where local recurrent connectivity is aligned with match-  
914 ing feedforward visual properties (preferred orientation, in our case). We therefore  
915 assumed that the probability of forming a synapse is modulated by the similarity  
916 in preferred orientation between two excitatory neurons (“Like-to-Like” rule; see  
917 Fig. 5a). The probability of connection between two neurons was proportional to

$$918 \quad p_{conn} \propto p_{Peters} (s_1 [p_{ori}] + (1-s_1)), \text{ where} \quad (5)$$

919  $p_{ori} = \text{vonmises}(\theta_i, \theta_j, \kappa)$ ;  $p_{Peters}$  is the connection probability under non-specific  
920 Peters’ rule connectivity, defined above; and  $s_1$  is the proportional strength of  
921 specificity  $s_1 \in [0, 1]$ . If  $s_1 = 0$  then Eq. (5) becomes equivalent to Peters’ rule. When  
922  $s_1 = 1$  then the probability of connecting orthogonally tuned neurons is zero.

923 **Feature-binding connectivity rule** The second rule for anatomical connection  
924 specificity corresponds to the case where local recurrent connectivity is not  
925 aligned with feedforward visual properties. Instead, it was designed to explore  
926 binding of simple visual features (“Feature-Binding” specificity; see Fig. 5e). Under  
927 this rule, a subnetwork combined neurons with a number  $\vartheta$  of different orienta-  
928 tion preferences. The preferred orientations used to compose a subnetwork in the  
929 Feature-Binding specificity model were chosen from periodic filtered noise fields.

930 Each noise field  $Z_{k,q}$  was built by generating a unit-magnitude complex number  
931  $z_j = \exp(-i\zeta_j)$  for each neuron in the model, with uniformly-distributed orienta-  
932 tions  $\zeta_j \in [-\pi, \pi)$ . Here “i” represents the complex number  $\sqrt{-1}$ ;  $k \in [1, N_s]$ ,  
933 where  $N_s$  is the number of subnetworks in the model;  $q \in [1, \vartheta]$ , where  $\vartheta$  is the  
934 number of preferred orientations per subnetworks. In our models described in this  
935 paper,  $N_s = 6$  and  $\vartheta = 2$ .

936 A field  $Z_{k,q}$  was defined by placing each  $z_j$  at the location  $\mathbf{u}_j$  of the correspond-  
937 ing neuron. Each complex field  $Z_{k,q}$  was spatially filtered by convolving with a  
938 Gaussian field  $\mathcal{G}_\rho$  on a torus, with a spatial std. dev. of  $\rho = 75 \mu\text{m}$  (width  $300 \mu\text{m}$ ).  
939 The angles from the resulting field of complex numbers was used as one orienta-  
940 tion component for one subnetwork, at each point in simulated space. The com-  
941 position of each subnetwork therefore changed smoothly across cortical space, so

942 that nearby neurons in the same subnetwork had similar functional selectivity.  
 943 Therefore,  $\angle(\mathbf{Z} \circ \mathbf{G}_\rho)$  defines a  $N_s \times \vartheta$  matrix of numbers where each element  
 944 determines one preferred orientation component of the corresponding  
 945 subnetwork.

946 Neurons were assigned to one of  $N_s$  subnetworks, according to the maximum  
 947 similarity between a neuron's preferred orientation and the orientation composi-  
 948 tion of the set of subnetworks at the location of the neuron's soma. The similarity  
 949 between a neuron's preferred orientation and a subnetwork orientation was com-  
 950 puted using a von Mises function with width parameter  $\kappa_2$ , such that the mem-  
 951 bership probability was proportional to

$$952 \quad p_m(k, \theta_i) \propto \left[ \max \left[ \text{vonmises}(\theta_i, \theta_{k,1}, \kappa_2), \text{vonmises}(\theta_i, \theta_{k,2}, \kappa_2) \right] \right], \quad (6)$$

953 where  $k$  is the index of an SSN consisting of preferred orientations  $\theta_{k,1}$  and  $\theta_{k,2}$ ;  
 954  $\theta_i$  is the preferred orientation of a neuron under consideration; and the expression  
 955 within the double brackets  $[\dots]$  was normalised to be a valid probability density  
 956 function over  $k$ . A neuron was assigned membership of an SSN according to the  
 957 formula

$$958 \quad M(i) = \arg \max_k (p_m(k, \theta_i)), \quad (7)$$

959 where  $M(i)$  gives the index of the SSN of which neuron  $i$  is a member.

960 The probability of connection between two neurons under the feature-binding  
 961 model is therefore given by

$$962 \quad p_{conn} \propto (1-s_2) p_{Peters} (s_1 [\mathcal{P}_{ori}] + 1 - s_1) + s_2 [b_{SSN} \cdot \mathcal{P}_{Peters}], \quad (8)$$

963 where parameter  $s_1$  determines the relative contribution of Non-Specific versus  
 964 orientation-tuned Like-to-Like specificity as in Eq. (5);  $s_2$  determines the relative  
 965 contribution of Feature-Binding specificity;  $\mathcal{P}_{ori} = \text{vonmises}(\theta_i, \theta_j, \kappa_1)$  as in Eq. (5);  
 966 and  $b_{SSN}$  is a value equal to 1 when the two neurons fall within the same subnet-  
 967 work; that is

$$968 \quad b_{SSN} = \begin{cases} 1 & \text{iff } M(i) = M(j) \\ 0 & \text{otherwise} \end{cases} \quad (9)$$

969 **Network input** Input was provided to the network as a simulation of orienta-  
 970 tion-tuned projections from layer 4 to layers 2/3 [60,61]. Each excitatory neuron  
 971 was assigned an orientation tuning curve based on a von Mises function (a circu-

972 lar, Gaussian-like function), with a randomly chosen preferred orientation  $\theta_i$  and  
973 a common input tuning curve width  $\kappa=4$ .  $\text{vonmises}(\cdot)$  is the non-normalised  
974 von Mises function with  $\text{vonmises}(\cdot) \in [0, 1]$ , given by  
975 
$$\text{vonmises}(t, \theta, \kappa) = \exp[\kappa \cos 2(t - \theta)]. \quad (10)$$

976 Current was injected into each simulated neuron proportional to the orientation  
977 tuning curve of that neuron, according to the orientation content of the stimulus:

978 
$$I_i(t) \propto \frac{A(t)}{N_N} \text{vonmises}(\theta_g(t), \theta_i, \kappa_i), \quad (11)$$

979 where  $A(t)$  is the amplitude of the stimulus at time  $t$ ;  $\theta_g(t)$  is the orientation of  
980 a grating stimulus at time  $t$ ;  $\theta_i$  is the preferred orientation of neuron  $i$ ;  $\kappa_i$  is the  
981 tuning curve width of neuron  $i$ ;  $N_N$  is the total number of neurons in the net-  
982 work. The input to the network is normalised such that the total current injected  
983 into the network is equal to  $A(t)$ . For a simulated plaid stimulus composed of  
984 the two component orientations  $\theta_{g1}$  and  $\theta_{g2}$ , input to a neuron was the linear  
985 average of input associated with each grating component, given by

986 
$$I_i(t) \propto \frac{A(t)}{2N_N} (\text{vonmises}(\theta_{g1}, \theta_i, \kappa_i) + \text{vonmises}(\theta_{g2}, \theta_i, \kappa_i)). \quad (12)$$

987 Both grating and plaid stimuli were considered to cover the full visual field. Tuned  
988 input currents were injected only into excitatory neurons, because we wanted to  
989 investigate the effect of excitatory recurrence on cortical information processing.  
990 Providing untuned feedforward input to inhibitory neurons can produce the illu-  
991 sion of competition between excitatory neurons, merely due to the thresholding  
992 effect of feedforward inhibitory input shared between those neurons.

993 ***Inclusion of experimental response variability*** We simulated large-scale networks  
994 as described above, and obtained responses to simulated visual stimuli. In order to  
995 mimic the response variability due to experimental conditions, such as recording  
996 noise and intrinsic neuronal response variability, we introduced a random com-  
997 ponent to the model responses.

998 For each presented stimulus  $i$  (e.g. a grating of a given orientation), we obtained a  
999 set  $S_i$  of single-trial responses  $r_{ij}$  for a single neuron such that  $r_{i,j} \in S_i$ , and the  
1000 trial-averaged response  $\bar{r}_i = \sum_{j=1..T} r_{i,j} / T$ , where  $T$  is the number of trials collec-  
1001 ted for that stimulus. Over the full set of stimuli for a given neuron, we determ-

1002 ined the maximum trial-averaged response  $\bar{r}_{\max} = \max_i \bar{r}_i$ . We then measured the  
1003 standard deviation  $\sigma$  over the collection of all single-trial responses over all stim-  
1004 uli for a given neuron normalised by  $\bar{r}_{\max}$ , such that  $\sigma = \text{std} \left( \bigcup_i S_i / \bar{r}_{\max} \right)$ . The  
1005 estimated experimental variability  $\hat{\sigma}$  was defined as the median  $\sigma$  over all recor-  
1006 ded neurons.

1007 A similar procedure in reverse was applied to model-simulated visual responses, to  
1008 mimic experimental variability. Activity of single neurons in response to a simu-  
1009 lated stimulus  $i$  was interpreted as the mean response  $\bar{r}_i$ , with  $\bar{r}_{\max}$  defined as  
1010 above. Single-trial model responses were then generated as  $r_{i,j} = \bar{r}_i + N(0, \hat{\sigma} \cdot \bar{r}_{\max})$ ,  
1011 where  $N(\mu, \sigma)$  generates a single normally-distributed random variate with  
1012 mean  $\mu$  and standard deviation  $\sigma$ . Twelve trials were generated for each stimulus  
1013 (i.e.  $T=12$ ), and single-trial responses were then analysed as described for experi-  
1014 mentally recorded responses.

1015 ***Estimation of parameters for connection rules*** Ko and colleagues characterised  
1016 functional specificity in mouse primary visual cortex, by recording in slice from  
1017 pairs of neurons that were functionally characterised *in vivo* [21]. We fit our func-  
1018 tion  $p_{\text{conn}}$  (Eq. (5)) to their measurements of the probability of connection between  
1019 neurons tuned for orientation, giving estimates for both  $\kappa_1$  and  $s_1$  ( $\hat{\kappa}_1 = 0.5$ ;  
1020  $\hat{s}_1 = 0.45$ ). These parameters correspond to fairly weak functional specificity. We  
1021 found that in the Like-to-Like specificity model, in order to have an appreciable  
1022 network effect we had to increase the strength of functional specificity to  $s_1 = 0.8$   
1023 (with  $\kappa_1 = 0.5$ ). The connectivity measurements of Yoshimura and colleagues sug-  
1024 gest that on the order of  $N=5-6$  subnetworks exist in layers 2/3 of rodent cortex  
1025 [15]. For the Feature-Binding specificity model, we took the parameters  $s_1 = 0.45$ ,  
1026  $s_2 = 0.225$ ,  $\kappa_1 = 0.5$ ,  $\kappa_2 = 4$ ,  $N = 6$ ,  $\vartheta = 2$ .

## 1027 **Statistical methods**

1028 We used a sample size commensurate with those used in the field, and sufficient  
1029 for statistical analysis of our observations. No explicit sample size computation  
1030 was performed.

1031 Two-sided, non-parametric statistical tests were used unless stated otherwise in  
1032 the text.

## 1033 Acknowledgements

1034 The authors gratefully acknowledge T Mrsic-Flogel, L Cossell and MF Iacaruso  
1035 for providing the data analysed in Fig.3. We are grateful to MA Penny and the  
1036 attendees of the CapoCaccia workshop for helpful discussions.

## 1037 Funding

1038 This work was supported by the Velux Stiftung (grant number 787 to DRM); the  
1039 Novartis Foundation (grants to DRM and BMK); the Swiss National Science  
1040 Foundation (grant number 31-120480 to BMK); the European Commission FP7  
1041 program (grant BrainScales 269921 to FH and BMK); and by the Convergent  
1042 Science Network (fellowships to DRM). The funders had no role in study design,  
1043 data collection and analysis, decision to publish, or preparation of the manuscript.

## 1044 Competing interests

1045 The authors declare no competing interests.

1046  
1047  
1048  
1049  
1050  
1051  
1052  
1053  
1054  
1055  
1056  
1057  
1058  
1059  
1060  
1061  
1062  
1063  
1064  
1065  
1066  
1067  
1068  
1069  
1070  
1071  
1072  
1073  
1074  
1075  
1076  
1077  
1078  
1079  
1080  
1081  
1082  
1083  
1084  
1085  
1086  
1087  
1088  
1089  
1090  
1091

## References

1. Binzegger T, Douglas RJ, Martin KAC. A quantitative map of the circuit of cat primary cortex. *Journal of Neuroscience* 2004;24(39):8441-53.
2. Braitenberg, Schüz. *Anatomy of the cortex: Statistics and geometry*. Springer-Verlag; 1991.
3. Hill SL, Wang Y, Riachi I, Schürmann F, Markram H. Statistical connectivity provides a sufficient foundation for specific functional connectivity in neocortical neural microcircuits. *Proc Natl Acad Sci U S A* 2012, Oct;109(42):E2885-94.
4. Binzegger T, Douglas R, Martin KAC. Topology and dynamics of the canonical circuit of cat V1. *Neural Networks* 2009;22:1071-8.
5. Ramaswamy S, Hill SL, King JG, Schürmann F, Wang Y, Markram H. Intrinsic morphological diversity of thick-tufted layer 5 pyramidal neurons ensures robust and invariant properties of in silico synaptic connections. *The Journal of Physiology* 2012, Feb 2;590(4):737-52.
6. Markram H, Muller E, Ramaswamy S, Reimann MW, Abdellah M, Sanchez CA, et al. Reconstruction and simulation of neocortical microcircuitry. *Cell* 2015, Oct 8;163(2):456-92.
7. Reimann MW, King JG, Muller EB, Ramaswamy S, Markram H. An algorithm to predict the connectome of neural microcircuits. *Front Comput Neurosci* 2015;9:120.
8. Peters A. Thalamic input to the cerebral cortex. *Trends Neurosci* 1979;2:183-5.
9. Juliano SL, Friedman DP, Eslin DE. Corticocortical connections predict patches of stimulus-evoked metabolic activity in monkey somatosensory cortex. *Journal of Comparative Neurology* 1990;298:23-39.
10. Malach R, Amir Y, Harel M, Grinvald A. Relationship between intrinsic connections and functional architecture revealed by optical imaging and in vivo targeted biocytin injections in primate striate cortex. *Proc. Natl. Acad. Sci. USA* 1993, Nov;90:10469-73.
11. Bosking WH, Zhang Y, Schofield B, Fitzpatrick D. Orientation selectivity and the arrangement of horizontal connections in tree shrew striate cortex. *Journal of Neuroscience* 1997, Mar 15;17(6):2112-27.
12. Muir DR, Da Costa NMA, Girardin C, Naaman S, Omer DB, Ruesch E, et al. Embedding of cortical representations by the superficial patch system. *Cerebral Cortex* 2011, Mar 7;21(10):2244-60.
13. Martin KA, Roth S, Rusch ES. Superficial layer pyramidal cells communicate heterogeneously between multiple functional domains of cat primary visual cortex. *Nat Commun* 2014;5:5252.
14. Ohki K, Chung S, Ch'ng YH, Kara P, Reid RC. Functional imaging with cellular resolution reveals precise micro-architecture in visual cortex. *Nature* 2005;433:597-603.
15. Yoshimura Y, Dantzker JLM, Callaway EM. Excitatory cortical neurons form fine-scale functional networks. *Nature* 2005, Feb 24;433:868-73.
16. Yoshimura Y, Callaway EM. Fine-scale specificity of cortical networks depends on inhibitory cell type and connectivity. *Nat Neurosci* 2005;8(11):1552-9.
17. Perin R, Berger TK, Markram H. A synaptic organizing principle for cortical neuronal groups. *Proc Natl Acad Sci U S A* 2011, Mar 3;108(13):5419-24.
18. Kampa BM, Letzkus JJ, Stuart GJ. Cortical feed-forward networks for binding different streams of sensory information. *Nat Neurosci* 2006, Dec;9(12):1472-3.
19. Yu YC, He S, Chen S, Fu Y, Brown KN, Yao XH, et al. Preferential electrical coupling regulates neocortical lineage-dependent microcircuit assembly. *Nature* 2012, Jun 7;486(7401):113-7.

- 1092 20. Song S, Sjöström PJ, Reigl M, Nelson S, Chklovskii DB. Highly nonrandom features of  
1093 synaptic local connectivity in local cortical circuits. *Public Library of Science Biology* 2005,  
1094 Mar;3(3):0507-19.
- 1095 21. Ko H, Hofer SB, Pichler B, Buchanan KA, Sjöström PJ, Mrsic-Flogel TD. Functional  
1096 specificity of local synaptic connections in neocortical networks. *Nature* 2011;473:87-91.
- 1097 22. Ko H, Cossell L, Baragli C, Antolik J, Clopath C, Hofer SB, Mrsic-Flogel TD. The emergence  
1098 of functional microcircuits in visual cortex. *Nature* 2013, Apr 3;496(7443):96-100.
- 1099 23. Li Y, Lu H, Cheng P-L, Ge S, Xu H, Shi S-H, Dan Y. Clonally related visual cortical neurons  
1100 show similar stimulus feature selectivity. *Nature* 2012, May 5;486(7401):118-21.
- 1101 24. Cossell L, Iacaruso MF, Muir DR, Houlton R, Sader EN, Ko H, et al. Functional organization  
1102 of excitatory synaptic strength in primary visual cortex. *Nature* 2015, Feb  
1103 4;518(7539):399-403.
- 1104 25. Lee WA, Bonin V, Reed M, Graham BJ, Hood G, Glattfelder K, Reid RC. Anatomy and  
1105 function of an excitatory network in the visual cortex. *Nature* 2016, Mar 28.
- 1106 26. Brown SP, Hestrin S. Intracortical circuits of pyramidal neurons reflect their long-range axonal  
1107 targets. *Nature* 2009, Feb 26;457(7233):1133-6.
- 1108 27. Morishima M, Morita K, Kubota Y, Kawaguchi Y. Highly differentiated projection-specific  
1109 cortical subnetworks. *J Neurosci* 2011, Jul 7;31(28):10380-91.
- 1110 28. Bopp R, Maçarico da Costa N, Kampa BM, Martin KA, Roth MM. Pyramidal cells make  
1111 specific connections onto smooth (gabaergic) neurons in mouse visual cortex. *PLoS Biol*  
1112 2014, Aug;12(8):e1001932.
- 1113 29. Muir DR, Mrsic-Flogel T. Eigenspectrum bounds for semirandom matrices with modular and  
1114 spatial structure for neural networks. *Physical Review E* 2015, Apr 24;91(4):042808.
- 1115 30. Muir DR, Roth MM, Helmchen F, Kampa BM. Model-based analysis of pattern motion  
1116 processing in mouse primary visual cortex. *Front Neural Circuits* 2015;9:38.
- 1117 31. Juavinett AL, Callaway EM. Pattern and component motion responses in mouse visual cortical  
1118 areas. *Curr Biol* 2015, Jun 29;25(13):1759-64.
- 1119 32. Palagina G, Meyer JF, Smirnakis SM. Complex visual motion representation in mouse area  
1120 V1. *J Neurosci* 2017, Jan 4;37(1):164-83.
- 1121 33. Movshon J, Adelson E, Gizzi M, Newsome W. The analysis of moving visual patterns. In:  
1122 Chagas, Gattass, Gross, editors. *Study Week on Pattern Recognition Mechanisms*.  
1123 Pontificiae Academiae Scientiarum Scripta Varia. Vatican City: Vatican Press; 1985. p.  
1124 117-51.
- 1125 34. Martin KAC, Schröder S. Functional heterogeneity in neighboring neurons of cat primary  
1126 visual cortex in response to both artificial and natural stimuli. *Journal of Neuroscience*  
1127 2013, Apr 24;33(17):7325-44.
- 1128 35. Aljadeff J, Renfrew D, Vegué M, Sharpee TO. Low-dimensional dynamics of structured  
1129 random networks. *Phys Rev E* 2016, Feb;93(2):022302.
- 1130 36. Lefort S, Tómm C, Floyd Sarria JC, Petersen CC. The excitatory neuronal network of the C2  
1131 barrel column in mouse primary somatosensory cortex. *Neuron* 2009, Jan 29;61(2):301-16.
- 1132 37. Amit DJ, Brunel N. Learning internal representations in an attractor neural network with  
1133 analogue neurons. *Network: Computation in Neural Systems* 1995;6(3):359-88.
- 1134 38. van Vreeswijk C, Sompolinsky H. Chaos in neuronal networks with balanced excitatory and  
1135 inhibitory activity. *Science* 1996, Dec 6;274(5293):1724-6.
- 1136 39. Tsodyks MV, Skaggs WE, Sejnowski TJ, McNaughton BL. Paradoxical effects of external  
1137 modulation of inhibitory interneurons. *J Neurosci* 1997, Jun 1;17(11):4382-8.
- 1138 40. Ozeki H, Finn IM, Schaffer ES, Miller KD, Ferster D. Inhibitory stabilization of the cortical  
1139 network underlies visual surround suppression. *Neuron* 2009, May 28;62(4):578-92.



- 1140 41. Atallah BV, Bruns W, Carandini M, Scanziani M. Parvalbumin-expressing interneurons  
1141 linearly transform cortical responses to visual stimuli. *Neuron* 2012, Jan 12;73(1):159-70.
- 1142 42. Douglas RJ, Mahowald MA, Martin KAC. Hybrid analog-digital architectures for  
1143 neuromorphic systems. *IEEE International Conference on Neural Networks*  
1144 1994;3:1848-53.
- 1145 43. Ben-Yishai R, Bar-Or RL, Sompolinsky H. Theory of orientation tuning in visual cortex. *Proc*  
1146 *Natl Acad Sci U S A* 1995, Apr;92:3844-8.
- 1147 44. Sadeh S, Clopath C, Rotter S. Processing of feature selectivity in cortical networks with  
1148 specific connectivity. *PLoS One* 2015, Jun 17;10(6):e0127547.
- 1149 45. Gabott PLA, Somogyi P. Quantitative distribution of gaba-immunoreactive neurons in the  
1150 visual cortex (area 17) of the cat. *Experimental Brain Research* 1986;61:323-31.
- 1151 46. Kerlin AM, Andermann ML, Berezovskii VK, Reid RC. Broadly tuned response properties of  
1152 diverse inhibitory neuron subtypes in mouse visual cortex. *Neuron* 2010, Sep;67:858-71.
- 1153 47. Ermentrout B. Linearization of F-I curves by adaptation. *Neural Computation*  
1154 1998;10:1721-9.
- 1155 48. Neftci E, Chicca E, Indiveri G, Douglas R. A systematic method for configuring VLSI  
1156 networks of spiking neurons. *Neural Computation* 2011;23(10):2457-97.
- 1157 49. Neftci E, Binas J, Rutishauser U, Chicca E, Indiveri G, Douglas RJ. Synthesizing cognition in  
1158 neuromorphic electronic systems. *Proceedings of the National Academy of Sciences*  
1159 2013;110(37):E3468-76.
- 1160 50. Shriki O, Hansel D, Sompolinsky H. Rate models for conductance-based cortical neuronal  
1161 networks. *Neural Computation* 2003, Aug;15(8):1809-41.
- 1162 51. Bock DD, Lee W-CA, Kerlin AM, Andermann ML, Hood G, Wetzell AW, et al. Network  
1163 anatomy and *in vivo* physiology of visual cortical neurons. *Nature* 2011, Mar;471:177-82.
- 1164 52. Hofer SB, Ko H, Pichler B, Vogelstein J, Ros H, Zeng H, et al. Differential connectivity and  
1165 response dynamics of excitatory and inhibitory neurons in visual cortex. *Nat Neurosci*  
1166 2011, Aug;14(8):1045-52.
- 1167 53. Liu B-H, Li P, Li Y-T, Sun YJ, Yanagawa Y, Obata K, et al. Visual receptive field structure of  
1168 cortical inhibitory neurons revealed by two-photon imaging guided recording. *J Neurosci*  
1169 2009, Aug;29(34):10520-32.
- 1170 54. Li L-Y, Li Y-T, Zhou M, Tao HW, Zhang LI. Intracortical multiplication of thalamocortical  
1171 signals in mouse auditory cortex. *Nat Neurosci* 2013, Aug 11;16(9):1179-81.
- 1172 55. Lien AD, Scanziani M. Tuned thalamic excitation is amplified by visual cortical circuits. *Nat*  
1173 *Neurosci* 2013, Aug 11;16(9):1315-23.
- 1174 56. Li Y-T, Ibrahim LA, Liu B-H, Zhang LI, Tao HW. Linear transformation of thalamocortical  
1175 input by intracortical excitation. *Nat Neurosci* 2013, Aug 11;16(9):1324-30.
- 1176 57. Zagha E, Ge X, McCormick DA. Competing neural ensembles in motor cortex gate goal-  
1177 directed motor output. *Neuron* 2015, Nov 4;88(3):565-77.
- 1178 58. Wertz A, Trenholm S, Yonehara K, Hillier D, Raics Z, Leinweber M, et al. Single-cell-  
1179 initiated monosynaptic tracing reveals layer-specific cortical network modules. *Science*  
1180 2015, Jul 3;349(6243):70-4.
- 1181 59. Rust NC, Mante V, Simoncelli EP, Movshon JA. How MT cells analyze the motion of visual  
1182 patterns. *Nat Neurosci* 2006, Nov;9(11):1421-31.
- 1183 60. Niell CM, Stryker MP. Highly selective receptive fields in mouse visual cortex. *J Neurosci*  
1184 2008, Jul;28(30):7520-36.
- 1185 61. Medini P. Cell-type-specific sub- and suprathreshold receptive fields of layer 4 and layer 2/3  
1186 pyramids in rat primary visual cortex. *Neuroscience* 2011, Sep 8;190:112-26.

- 1187 62. Mariño J, Schummers J, Lyon DC, Schwabe L, Beck O, Wiesing P, et al. Invariant  
1188 computations in local cortical networks with balanced excitation and inhibition. *Nat*  
1189 *Neurosci* 2005;8(2):194-201.
- 1190 63. Fino E, Yuste R. Dense inhibitory connectivity in neocortex. *Neuron* 2011;69:1188-203.
- 1191 64. Ma WP, Liu BH, Li YT, Huang ZJ, Zhang LI, Tao HW. Visual representations by cortical  
1192 somatostatin inhibitory neurons--selective but with weak and delayed responses. *J Neurosci*  
1193 2010, Oct 27;30(43):14371-9.
- 1194 65. Wilson NR, Runyan CA, Wang FL, Sur M, Wilson NR, Runyan CA, et al. Division and  
1195 subtraction by distinct cortical inhibitory networks in vivo. *Nature* 2012, Aug 8.
- 1196 66. Litwin-Kumar A, Rosenbaum R, Doiron B. Inhibitory stabilization and visual coding in  
1197 cortical circuits with multiple interneuron subtypes. *J Neurophysiol* 2016, Jan  
1198 6;115:1399-409.
- 1199 67. White LE, Fitzpatrick D. Vision and cortical map development. *Neuron* 2007;56:327-38.
- 1200 68. Rochefort NL, Narushima M, Grienberger C, Marandi N, Hill DN, Konnerth A.  
1201 Development of direction selectivity in mouse cortical neurons. *Neuron* 2011, Aug  
1202 11;71(3):425-32.
- 1203 69. Galuske RA, Singer W. The origin and topography of long-range intrinsic projections in cat  
1204 visual cortex: A developmental study. *Cerebral Cortex* 1996;6:417-30.
- 1205 70. Luhmann HJ, Millán LM, Singer W. Development of horizontal intrinsic connections in cat  
1206 striate cortex. *Experimental Brain Research* 1986;63:443-8.
- 1207 71. Luhmann HJ, Singer W, Martinez-Millán L. Horizontal interactions in cat striate cortex: I.  
1208 Anatomical substrate and postnatal development. *European Journal of Neuroscience*  
1209 1990;2:344-57.
- 1210 72. Katz LC, Callaway EM. Development of local circuits in mammalian visual cortex. *Annu Rev*  
1211 *Neurosci* 1992;15:31-56.
- 1212 73. Miller B, Blake NM, Erinjeri JP, Reistad CE, Sexton T, Admire P, Woolsey TA. Postnatal  
1213 growth of intrinsic connections in mouse barrel cortex. *The Journal of Comparative*  
1214 *Neurology* 2001, Jul 17;436(1):17-31.
- 1215 74. Kampa BM, Letzkus JJ, Stuart GJ. Dendritic mechanisms controlling spike-timing-dependent  
1216 synaptic plasticity. *Trends Neurosci* 2007, Sep;30(9):456-63.
- 1217 75. Markram H, Gerstner W, Sjöström J. Spike-Timing-Dependent plasticity: A comprehensive  
1218 overview. *Frontiers in Synaptic Neuroscience* 2012;4.
- 1219 76. Clopath C, Büsing L, Vasilaki E, Gerstner W. Connectivity reflects coding: A model of  
1220 voltage-based STDP with homeostasis. *Nat Neurosci* 2010, Mar;13(3):344-52.
- 1221 77. Litwin-Kumar A, Doiron B. Formation and maintenance of neuronal assemblies through  
1222 synaptic plasticity. *Nat Commun* 2014;5:5319.
- 1223 78. Sadeh S, Clopath C, Rotter S. Emergence of functional specificity in balanced networks with  
1224 synaptic plasticity. *PLoS Comput Biol* 2015, Jun;11(6):e1004307.
- 1225 79. Pecka M, Han Y, Sader E, Mrsic-Flogel TD. Experience-Dependent specialization of  
1226 receptive field surround for selective coding of natural scenes. *Neuron* 2014.
- 1227 80. Rigotti M, Barak O, Warden MR, Wang X, Daw ND, Miller EK, Fusi S. The importance of  
1228 mixed selectivity in complex cognitive tasks. *Nature* 2013, May 19;497(7451):585-90.
- 1229 81. Raposo D, Kaufman MT, Churchland AK. A category-free neural population supports  
1230 evolving demands during decision-making. *Nat Neurosci* 2014, Nov 10;17(12):1784-92.
- 1231 82. Kampa, Roth, Göbel, Helmchen. Representation of visual scenes by local neuronal populations  
1232 in layer 2/3 of mouse visual cortex. *Front Neural Circuits* 2011, Nov 23;5 (18).
- 1233 83. Roth MM, Helmchen F, Kampa BM. Distinct functional properties of primary and  
1234 posteromedial visual area of mouse neocortex. *J Neurosci* 2012, Jul 11;32(28):9716-26.

- 1235 84. Stosiek C, Garaschuk O, Holthoff K, Konnerth A. In vivo two-photon calcium imaging of  
1236 neuronal networks. *Proc Natl Acad Sci U S A* 2003, Jun 6;100(12):7319-24.
- 1237 85. Nimmerjahn A, Kirchhoff F, Kerr JN, Helmchen F. Sulforhodamine 101 as a specific marker  
1238 of astroglia in the neocortex in vivo. *Nat Methods* 2004, Oct;1(1):31-7.
- 1239 86. Muir DR, Kampa BM. FocusStack and stimserver: A new open source MATLAB toolchain  
1240 for visual stimulation and analysis of two-photon calcium neuronal imaging data. *Frontiers*  
1241 *in Neuroinformatics* 2015, Jan 20;8:85.
- 1242 87. Chen T-W, Wardill TJ, Sun Y, Pulver SR, Renninger SL, Baohan A, et al. Ultrasensitive  
1243 fluorescent proteins for imaging neuronal activity. *Nature* 2013;499(7458):295-300.
- 1244 88. Kleiner M, Brainard D, Pelli D, Ingling A, Murray R, Broussard C. What's new in  
1245 psychtoolbox-3. *Perception* 2007;36(14):1-.
- 1246 89. Ahmed B, Anderson JC, Douglas RJ, Martin KA, Whitteridge D. Estimates of the net  
1247 excitatory currents evoked by visual stimulation of identified neurons in cat visual cortex.  
1248 *Cerebral Cortex* 1998;8:462-76.
- 1249 90. Hahnloser RHR. On the piecewise analysis of networks of linear threshold neurons. *Neural*  
1250 *Networks* 1998;11:691-7.
- 1251 91. Muir DR, Cook M. Anatomical constraints on lateral competition in columnar cortical  
1252 architectures. *Neural Computation* 2014, Aug;26(8):1624-66.
- 1253 92. Schüz A, Palm G. Density of neurons and synapses in the cerebral cortex of the mouse. *Journal*  
1254 *of Comparative Neurology* 1989;286(4):442-55.
- 1255 93. Hellwig B. A quantitative analysis of the local connectivity between pyramidal neurons in  
1256 layers 2/3 of the rat visual cortex. *Biol Cybern* 2000;82(2):111-21.
- 1257 94. Boucsein C, Nawrot MP, Schnepel P, Aertsen A. Beyond the cortical column: Abundance and  
1258 physiology of horizontal connections imply a strong role for inputs from the surround.  
1259 *Front Neurosci* 2011;5:32.
- 1260 95. Holmgren C, Harkany T, Svennenfors B, Zilberter Y. Pyramidal cell communication within  
1261 local networks in layer 2/3 of rat neocortex. *The Journal of Physiology* 2003,  
1262 Aug;551(1):139-53.
- 1263 96. Binzegger T, Douglas RJ, Martin KAC. Stereotypical bouton clustering of individual neurons  
1264 in cat primary visual cortex. *Journal of Neuroscience* 2007, Nov 7;27(45):12242-54.

1265 Tables

1266 **Table 1: Summary of nominal model parameters and model variables.** Abbreviations: Exc:  
1267 Excitatory; Inh: Inhibitory; Prop: proportion.

| Parameter                   | Description                                                                                    | Nominal value                                                                                   |
|-----------------------------|------------------------------------------------------------------------------------------------|-------------------------------------------------------------------------------------------------|
| $\tau_i$                    | Lumped neuron time constant for neuron $i$                                                     | 10 ms                                                                                           |
| $g_j$                       | Nominal charge injected by synapses from neuron $j$                                            | Exc.: 0.01 pC/spike/synapse<br>Inh.: 10×0.01 pC/spike/synapse                                   |
| $\alpha_j$                  | Nominal output gain of neuron $j$                                                              | 0.066 spikes/pC                                                                                 |
| $n_{i,j}$                   | Number of synapses made from neuron $j$ to neuron $i$                                          |                                                                                                 |
| $\beta_j$                   | Threshold of neuron $j$                                                                        | Zero                                                                                            |
| $\sigma_i \cdot \zeta_i(t)$ | Noise current injected into neuron $i$ . Wiener process with std. dev. $\sigma_i$ after 1 sec. | $\sigma_i = 5$ mA                                                                               |
| $N_N$                       | Number of neurons in simulation                                                                | 80,000 (10% of cortical density)                                                                |
| Prop. inh.                  | Proportion of inhibitory neurons                                                               | 18%                                                                                             |
|                             | Dimensions of simulated torus space                                                            | 2.2×2.2 mm                                                                                      |
| $S_i$                       | Nominal number of synapses made by neuron $i$ (within superficial layers only)                 | Exc.: 8142 Inh.: 8566                                                                           |
| $\sigma_{d,i}$              | Std. Dev. of Gaussian dendritic field of neuron $i$                                            | 75 $\mu$ m (approx. width 300 $\mu$ m)                                                          |
| $\sigma_{a,i}$              | Std. dev. of Gaussian axonal field of neuron $i$                                               | Exc.: 290 $\mu$ m (approx. width 1100 $\mu$ m)<br>Inh.: 100 $\mu$ m (approx. width 400 $\mu$ m) |
| $\kappa_i$                  | Input orientation tuning width parameter for neuron $i$                                        | 4                                                                                               |
| $s_1$                       | Degree of like-to-like modulation of anatomical connection probability                         |                                                                                                 |
| $s_2$                       | Degree of feature-binding modulation of connection probability                                 |                                                                                                 |
| $\kappa_1$                  | Orientation tuning of like-to-like connection probability                                      |                                                                                                 |
| $\kappa_2$                  | Orientation tuning of subnetwork membership probability                                        |                                                                                                 |
| $N_s$                       | Number of subnetworks that exist at a point in cortex                                          |                                                                                                 |
| $\vartheta$                 | Number of preferred orientations bound in an subnetwork                                        |                                                                                                 |

1288 **Table 2: Parameter values used to specify large-scale network models.**

| Network configuration             | Parameter values                                                              |
|-----------------------------------|-------------------------------------------------------------------------------|
| Random connectivity model         | $s_1 = 0, s_2 = 0$                                                            |
| Like-to-like specificity model    | $s_1 = 0.8, s_2 = 0, \kappa_1 = 0.5$                                          |
| Feature-binding specificity model | $s_1 = 0.1, s_2 = 0.25, \kappa_1 = 0.5, \kappa_2 = 4, N_s = 6, \vartheta = 2$ |

1292

## 1293 Figure captions

1294 **Figure 1: Like-to-like and feature-binding rules for local recurrent connectivity.** **a** Con-  
1295 nectivity scheme where local recurrent excitatory connections (between neurons grouped  
1296 by dashed ovals) are matched to the feedforward visual preferences of the connected neur-  
1297 ons (“like-to-like” over orientation preference, indicated by grating icons). **b** Connectivity  
1298 scheme where local recurrent excitatory connections are different from the feedforward  
1299 visual preferences of connected neurons (“feature-binding”). Exc.: excitatory.

1300 **Figure 2: Plaid responses are facilitatory and selective in mouse V1.** **(a, b)** Two-photon cal-  
1301 cium imaging of visual responses in mouse V1. **(b)** Average of 6 imaging frames. **(c)** Trial-  
1302 averaged responses (7 trials) of a single neuron in mouse V1 to grating and **(d–f)** plaid stim-  
1303 uli of varying relative component orientations. **g–h** Response tuning of the same neuron in  
1304 c–f. Neurons can be highly tuned to oriented gratings, and also highly selective for particu-  
1305 lar combinations of grating components. **i** When three sets of plaid stimuli with varying rel-  
1306 ative component angles are presented, the majority of neurons have facilitating responses  
1307 to plaids (64% with  $MI > 0.05$ ). In response to  $90^\circ$  plaids alone however, neurons are more  
1308 evenly split between facilitation and suppression (39% with  $MI > 0.05$ ; dashed). **j** Responses  
1309 to combined plaid sets are significantly more selective than responses to  $90^\circ$  plaids alone,  
1310 and significantly more selective than predicted plaid responses under a component  
1311 response model [86]. \*\*\*  $p < 1 \times 10^{-10}$ , Wilcoxon rank-sum test. OSI: orientation selectivity  
1312 index; DSI: direction selectivity index; PSI: plaid selectivity index; MI: modulation index;  
1313 facil.: facilitating; supp.: suppressing; prop.: proportion.

1314 **Figure 3: Connected neurons span a wide range of preferred orientations in mouse V1.** **a**  
1315 Characterisation of receptive field location using sparse drifting/rotating grating stimuli.  
1316 Single-trial OGB calcium responses (black); presentation time of optimal stimulus and sub-  
1317 optimal stimulus indicated (black and grey bars). Right inset: estimated RF location for the  
1318 same neuron. **b** Single-trial OGB calcium response to drifting grating stimuli (black); presen-  
1319 tation of optimal stimulus orientation indicated above, all stimulus presentation times indic-  
1320 ated below. Right inset: calculation of grating response similarity  $\rho_g$  between two neurons. **c**  
1321 Single-trial (grey) and trial-averaged OGB calcium response (black) to natural movie stimuli.  
1322 Vertical lines indicate timing of movie sequence onset. Right inset: calculation of movie  
1323 response similarity ( $\rho_m$ ), using signal correlations over trial-averaged responses from two  
1324 neurons. **d** Pairs of neurons with high signal correlations to natural movies ( $\rho_m$ ), which pre-  
1325 dicta a high probability of connection [21], can have similar or dissimilar grating responses.  
1326 Pairs of neurons with similar orientation preference are not more likely to have high  $\rho_m$  **(e)**  
1327 or high signal correlation to flashed natural scenes  $\rho_{Ca}$  **(f)** than pairs with dissimilar orienta-  
1328 tion preference. **g** Connected pairs are slightly more likely to share similar orientation pref-  
1329 erences than unconnected pairs [21,24], but nevertheless span almost arbitrary orientation  
1330 differences ( $\approx 20\%$  of pairs with close to orthogonal orientation preference). d–e: *in vivo*

1331 two-photon calcium imaging; f–g: *in vivo* calcium imaging coupled with *in vitro* simultan-  
1332 eous patching to detect connected pairs; data from [24]. e–f: Kruskal-Wallis tests; g: Ansari-  
1333 Bradley test. n.s.:  $p > 0.05$ . Strong connections: strongest 50% of connected pairs, measured  
1334 by EPSP amplitude. Corr: correlation; conn.: connection.

1335 **Figure 4: Rules for excitatory connectivity influence stimulus representations, and under-**  
1336 **lie amplification and competition. a** In a simple model for random connectivity in  
1337 mouse V1, injecting current into a single neuron (black outline) leads to non-specific activa-  
1338 tion of other excitatory (triangle) and inhibitory neurons (circle). Traces show the instantan-  
1339 eous firing rate of each neuron. **b** When the model is partitioned into subnetworks (SN1 & 2;  
1340 dashed ovals), injecting current into a single neuron gives rise to an amplified response  
1341 within the same subnetwork and suppresses activity in the non-driven subnetwork. **c** The  
1342 degree of amplification and suppression depends directly on the proportion of excitatory  
1343 synapses  $s$  restricted to be made within a subnetwork (see Fig. S1). Values of  $s$  used in pan-  
1344 els **a–b** indicated on plot. **d** When local recurrent excitatory connections match the feedfor-  
1345 ward visual properties of connected neurons (“like-to-like”), grating responses (top) and  
1346 plaid responses (bottom) are highly similar (high  $\rho_g$  &  $\rho_p$ ). **e** In contrast, when local recurrent  
1347 connections are different from the feedforward visual properties—in this case, grouping  
1348 two different preferred orientations (“feature-binding”)—then neurons with similar grating  
1349 responses (top, high  $\rho_g$ ) can have dissimilar plaid responses (bottom, low  $\rho_p$ ), reflecting  
1350 decorrelation of these responses caused by competition. Black outlines: stimulated neurons.  
1351 Grating labels: preferred orientation of that neuron. Dashed ovals: neurons grouped by  
1352 specific excitatory connectivity. a.u.: arbitrary units; prop.: proportion; syns.: synapses.  
1353 Other conventions as in Fig. 1.

1354 **Figure 5: Rules for excitatory connectivity determine response correlation and decorrela-**  
1355 **tion in a model of mouse V1. a–b** In a large-scale network simulation incorporating like-to-  
1356 like selective excitatory connectivity (connectivity rule and network schematic shown at  
1357 left), responses of pairs of neurons to grating and plaid stimuli are always similar (**b**; similar  
1358  $\rho_g$  &  $\rho_p$ , high  $R^2$ ). Traces: instantaneous firing rates for single example excitatory (black) and  
1359 inhibitory (blue) neurons. Responses to grating stimuli are highly predictive of plaid  
1360 responses; distribution of  $\rho_g$  versus  $\rho_p$  is therefore clustered around the diagonal (black line  
1361 in **b**; high  $R^2$ ). **c–d** When in addition to like-to-like connectivity, subnetworks also group  
1362 neurons with several preferred orientations, then pairs of neurons with similar preferred ori-  
1363 entations can respond differently to plaid stimuli, and vice versa (see response traces). **d**  
1364 Competition due to feature-binding connectivity leads to decorrelation of the population  
1365 response (low  $R^2$ ). The distribution of  $\rho_g$  versus  $\rho_p$  is broad (black line in **d**), indicating poor  
1366 predictability between grating and plaid responses. Inhibitory responses are broadly tuned  
1367 in both models (blue traces in **a** & **b**). Pips in connectivity diagram in **c** indicate example  
1368 preferred orientations of a single subnetwork. Conventions as in Fig. 1. Stim.: stimuli; a.u.:  
1369 arbitrary units; corr.: correlation; feat. bind.: feature binding.

1370 **Figure 6: Responses to contrast-oscillating plaid and grating stimuli in mouse V1 suggest**  
1371 **feature-binding connection rules.** **a** Single-trial OGB calcium response to contrast-oscillat-  
1372 ing grating and plaid stimuli; presentation time of stimuli evoking strong responses indic-  
1373 ated above trace. Right inset: measurement of plaid response similarity  $\rho_p$  between two  
1374 neurons. **b** Trial-averaged responses (8 trials) of a pair of neurons from a single imaging site,  
1375 with similar preferred orientations (polar plots at left; high  $\rho_g$ ) but with dissimilar responses  
1376 to plaid stimuli (low  $\rho_p$ ). **c** Responses to grating and plaid stimuli are poorly related in ori-  
1377 entation-tuned neurons in mouse v1 (Broad distribution of  $\rho_g$  versus  $\rho_p$  residuals—black  
1378 line, low  $R^2$ ). **d** Control data that includes experimental noise and response variability,  
1379 obtained by resampling experimental responses and assuming a like-to-like connectivity  
1380 rule (inset; see Methods), predicts a strong relationship between grating and plaid repres-  
1381 entations (high  $R^2$ ) and is easily distinguished from observed v1 responses in c. **e** Decorrela-  
1382 tion in mouse v1 is similar to the “feature-binding” model (F.B.), and much broader than the  
1383 “like-to-like” model (L-to-L). **f** Responses to plaid stimuli in v1 are split between facilitating  
1384 and suppressing (45%  $MI > 0.05$ ; 42%  $MI < -0.05$ ). **g** The distribution of facilitating (Facil.;  
1385  $MI > 0.05$ ) and suppressing (Supp.,  $MI < -0.05$ ) responses is similar between mouse v1 and  
1386 the “feature-binding” model (F.B.;  $p = 0.17$ , Fisher’s exact test). The “like-to-like” and ran-  
1387 dom non-specific (Rnd) connectivity models produced predominately suppressing  
1388 responses. \*\*\* $p < 0.001$ .  $n_{v1} = 313$ ;  $n_{F.B.} = 804$ ;  $n_{L-to-L} = 729$ ;  $n_{Rnd} = 729$ ; significantly responsive  
1389 neurons with  $OSI > 0.3$ . Stim: stimuli; corr.: correlation; decorr.: decorrelation.

1390 **Figure 7: Non-random connectivity supports autoassociative behaviour.** In a simple model  
1391 with two subnetworks (**a**), presenting a linear graduated mixture between the ideal stimuli  
1392 for the two subnetworks (**b**) results in competition and switching between network repres-  
1393 entations. When the stimulus is ideal for one subnetwork (mixture=0% or 100%), then  
1394 strong amplification of the network response occurs (compare with response of SN1 to a  
1395 single grating component; arrowheads at right of b). When an approximately even mixture  
1396 is presented (above and below 50%), the network switches rapidly from one representation  
1397 to the other. Proportion of specific excitatory synapses  $s = 25\%$ . Dashed ovals: neurons  
1398 grouped by specific excitatory connectivity. Other conventions as in Fig.1. a.u.: arbitrary  
1399 units.

1400 **Supplementary Figure 1: Estimated parameters for cortex place it in an Inhibition-Stabil-**  
1401 **ised Network (ISN) regime, with competition provided by specific excitatory connectivity.**  
1402 **a** The network stability regimes in the parameter space defined by total inhibitory weight  
1403  $g_I \cdot n_I$  and total excitatory weight  $g_E \cdot n_E$  for a random network (proportion of specific synapses  
1404  $s = 0\%$ ). Nominal parameter estimates for rodent cortex (cross) place the network in a  
1405 regime that requires inhibitory feedback for stability (an ISN; [39]), but which does not lead

1406 to competition between excitatory neurons. Inhibition must be unrealistically strengthened  
1407 to obtain competition ( $100\times$  and  $200\times$  estimates for rodent cortex; top of panel; shading  
1408 indicates competition). However, overly-strong inhibition leads to inhibition-driven oscilla-  
1409 tions (IO). **b** When the proportion of specific synapses  $s$  is raised to 20%, nominal paramet-  
1410 ers for rodent cortex permit competition (shading indicates strength of competition; see  
1411 Methods). Note that the maximum excitatory strength permitted while maintaining network  
1412 stability is reduced. **c** When  $s=40\%$ , nominal parameters for rodent cortex become unst-  
1413 able (cross is just outside stable region). **d** Network stability regimes for the parameter  
1414 space defined by  $s$  and  $g_E \cdot n_E$ , with nominal value chosen for  $g_I \cdot n_I$  (crosses in a–c). Nominal  
1415 value for  $g_E \cdot n_E$  is indicated by a dashed line. Both excitatory strength  $g_E \cdot n_E$  and the propor-  
1416 tion of specific synapses  $s$  affect network stability and the strength of competition. Abbrevi-  
1417 ations:  $g_{I,E}$ : Synaptic strength per inhibitory or excitatory synapse;  $n_{I,E}$ : Number of synapses  
1418 made by each inhibitory or excitatory neuron; AS: Intrinsically stable network, stable in the  
1419 absence of inhibition; ISN: Inhibition-Stabilised Network, requiring inhibitory feedback for  
1420 stability; Exp: Runaway activity due to exponentially divergent unstable fixed point;  
1421 IO: Oscillatory activity due to strong inhibition. a.u.: arbitrary units.

1422 **Supplementary Figure 2: Grating and plaid responses are highly correlated in a model**  
1423 **with random connectivity.** **a** Under the non-specific connectivity model, synapses  
1424 between pairs of neurons are formed without regard to functional response similarity of the  
1425 neurons. Neurons form synapses stochastically, according to spatial proximity. Two  
1426 example pairs of neurons are shown, and their responses to a set of grating and plaid stim-  
1427 uli. **b** Neurons with similar responses to grating stimuli (high  $\rho_g$ ) always have similar  
1428 responses to plaid stimuli (high  $\rho_p$ ), and vice versa. Conn.: connectivity; stim.: stimuli.



# Figure 1

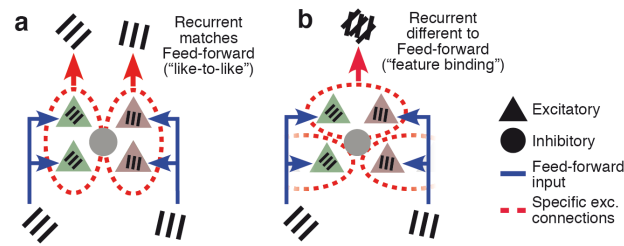

**Figure 1: Like-to-like and feature-binding rules for local recurrent connectivity.**  
**a** Connectivity scheme where local recurrent excitatory connections (between neurons grouped by dashed ovals) are matched to the feedforward visual preferences of the connected neurons (“like-to-like” over orientation preference, indicated by grating icons). **b** Connectivity scheme where local recurrent excitatory connections are different from the feedforward visual preferences of connected neurons (“feature-binding”). Exc.: excitatory.

## Figure 2

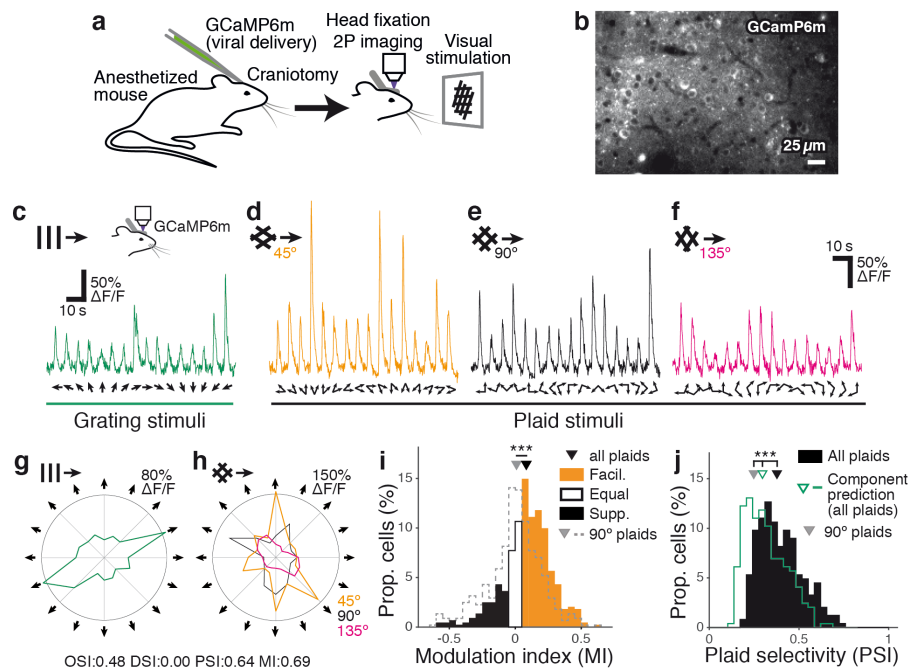

### Figure 2: Plaid responses are facilitatory and selective in mouse V1. (a, b)

Two-photon calcium imaging of visual responses in mouse V1. (b) Average of 6 imaging frames. (c) Trial-averaged responses (7 trials) of a single neuron in mouse V1 to grating and (d–f) plaid stimuli of varying relative component orientations. g–h Response tuning of the same neuron in c–f. Neurons can be highly tuned to oriented gratings, and also highly selective for particular combinations of grating components. i When three sets of plaid stimuli with varying relative component angles are presented, the majority of neurons have facilitatory responses to plaids (64% with MI > 0.05). In response to 90° plaids alone however, neurons are more evenly split between facilitation and suppression (39% with MI > 0.05; dashed). j Responses to combined plaid sets are significantly more selective than responses to 90° plaids alone, and significantly more selective than predicted plaid responses under a component response model [86]. \*\*\*  $p < 1 \times 10^{-10}$ , Wilcoxon rank-sum test. OSI: orientation selectivity index; DSI: direction selectivity index; PSI: plaid selectivity index; MI: modulation index; facil.: facilitatory; supp.: suppressing; prop.: proportion.

## Figure 3

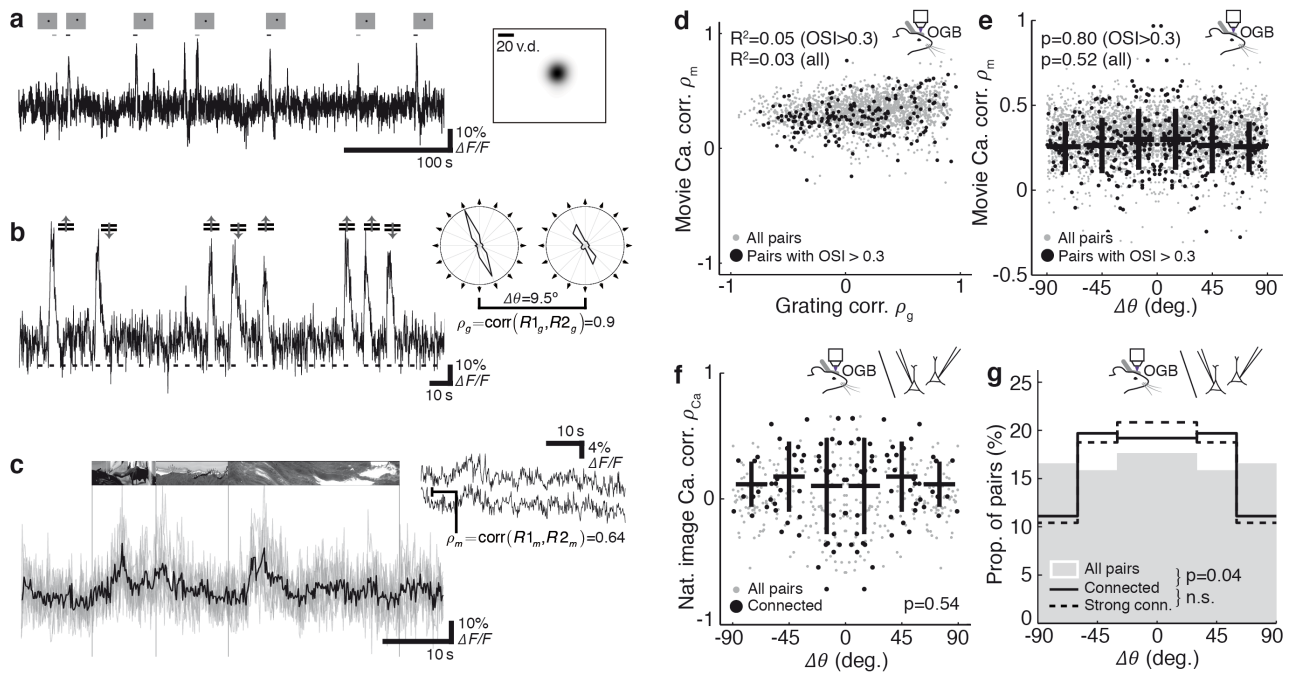

**Figure 3: Connected neurons span a wide range of preferred orientations in mouse V1.** **a** Characterisation of receptive field location using sparse drifting/rotating grating stimuli. Single-trial OGB calcium responses (black); presentation time of optimal stimulus and sub-optimal stimulus indicated (black and grey bars). Right inset: estimated RF location for the same neuron. **b** Single-trial OGB calcium response to drifting grating stimuli (black); presentation of optimal stimulus orientation indicated above, all stimulus presentation times indicated below. Right inset: calculation of grating response similarity  $\rho_g$  between two neurons. **c** Single-trial (grey) and trial-averaged OGB calcium response (black) to natural movie stimuli. Vertical lines indicate timing of movie sequence onset. Right inset: calculation of movie response similarity ( $\rho_m$ ), using signal correlations over trial-averaged responses from two neurons. **d** Pairs of neurons with high signal correlations to natural movies ( $\rho_m$ ), which predicts a high probability of connection [21], can have similar or dissimilar grating responses. Pairs of neurons with similar orientation preference are not more likely to have high  $\rho_m$  (e) or high signal correlation to flashed natural scenes  $\rho_{Ca}$  (f) than pairs with dissimilar orientation preference. **g** Connected pairs are slightly more likely to share similar orientation preferences than unconnected pairs [21,24], but nevertheless span almost arbitrary orientation differences ( $\approx 20\%$  of pairs with close to orthogonal orientation preference). **d–e**: in vivo two-photon calcium imaging; **f–g**: in vivo calcium imaging coupled with in vitro simultaneous patching to detect connected pairs; data from [24]. **e–f**: Kruskal-Wallis tests; **g**: Ansari-Bradley test. n.s.:  $p > 0.05$ . Strong connections: strongest 50% of connected pairs, measured by EPSP amplitude. Corr: correlation; conn.: connection.

## Figure 4

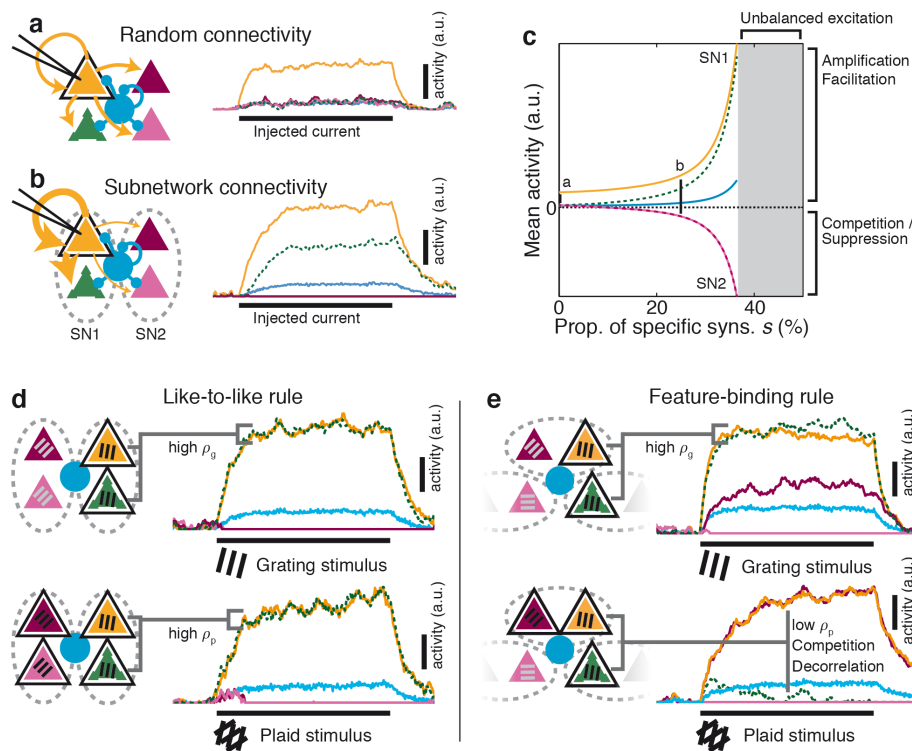

**Figure 4: Rules for excitatory connectivity influence stimulus representations, and underlie amplification and competition.** **a** In a simple model for random connectivity in mouse V1, injecting current into a single neuron (black outline) leads to non-specific activation of other excitatory (triangle) and inhibitory neurons (circle). Traces show the instantaneous firing rate of each neuron. **b** When the model is partitioned into subnetworks (SN1 & 2; dashed ovals), injecting current into a single neuron gives rise to an amplified response within the same subnetwork and suppresses activity in the non-driven subnetwork. **c** The degree of amplification and suppression depends directly on the proportion of excitatory synapses  $s$  restricted to be made within a subnetwork (see Fig. S1). Values of  $s$  used in panels a–b indicated on plot. **d** When local recurrent excitatory connections match the feedforward visual properties of connected neurons (“like-to-like”), grating responses (top) and plaid responses (bottom) are highly similar (high  $\rho_g$  &  $\rho_p$ ). **e** In contrast, when local recurrent connections are different from the feedforward visual properties — in this case, grouping two different preferred orientations (“feature-binding”) — then neurons with similar grating responses (top, high  $\rho_g$ ) can have dissimilar plaid responses (bottom, low  $\rho_p$ ), reflecting decorrelation of these responses caused by competition. Black outlines: stimulated neurons. Grating labels: preferred orientation of that neuron. Dashed ovals: neurons grouped by specific excitatory connectivity. a.u.: arbitrary units; prop.: proportion; syns.: synapses. Other conventions as in Fig. 1.

## Figure 5

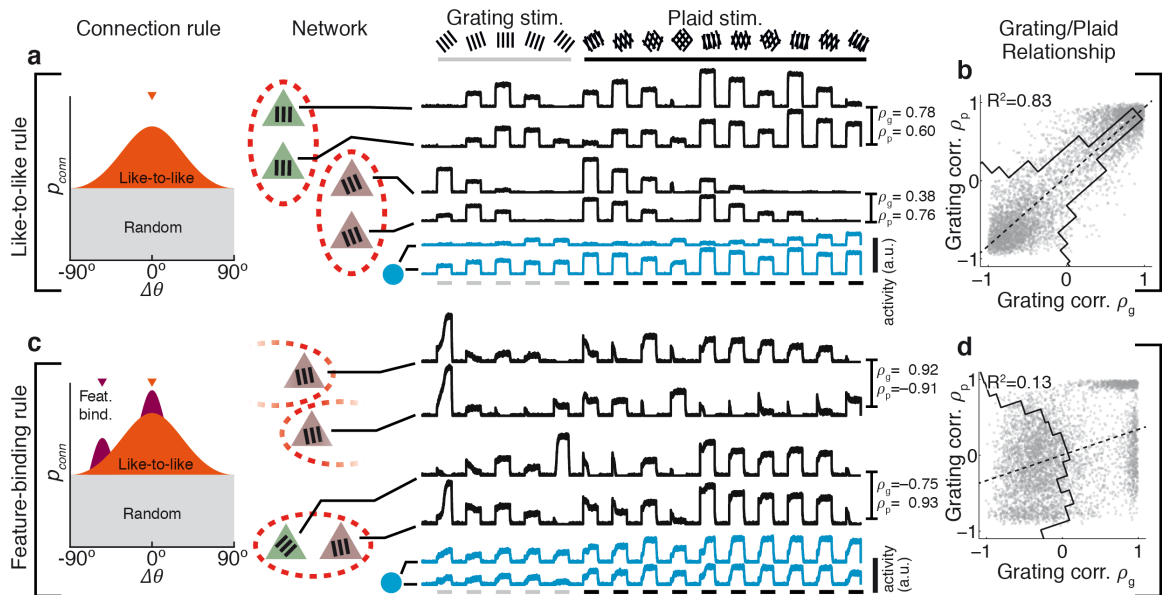

**Figure 5: Rules for excitatory connectivity determine response correlation and decorrelation in a model of mouse V1.** **a–b** In a large-scale network simulation incorporating like-to-like selective excitatory connectivity (connectivity rule and network schematic shown at left), responses of pairs of neurons to grating and plaid stimuli are always similar (**b**; similar  $\rho_g$  &  $\rho_p$ , high  $R^2$ ). Traces: instantaneous firing rates for single example excitatory (black) and inhibitory (blue) neurons. Responses to grating stimuli are highly predictive of plaid responses; distribution of  $\rho_g$  versus  $\rho_p$  is therefore clustered around the diagonal (black line in **b**; high  $R^2$ ). **c–d** When in addition to like-to-like connectivity, subnetworks also group neurons with several preferred orientations, then pairs of neurons with similar preferred orientations can respond differently to plaid stimuli, and vice versa (see response traces). **d** Competition due to feature-binding connectivity leads to decorrelation of the population response (low  $R^2$ ). The distribution of  $\rho_g$  versus  $\rho_p$  is broad (black line in **d**), indicating poor predictability between grating and plaid responses. Inhibitory responses are broadly tuned in both models (blue traces in **a** & **b**). Pips in connectivity diagram in **c** indicate example preferred orientations of a single subnetwork. Conventions as in Fig. 1. Stim.: stimuli; a.u.: arbitrary units; corr.: correlation; feat. bind.: feature binding.

## Figure 6

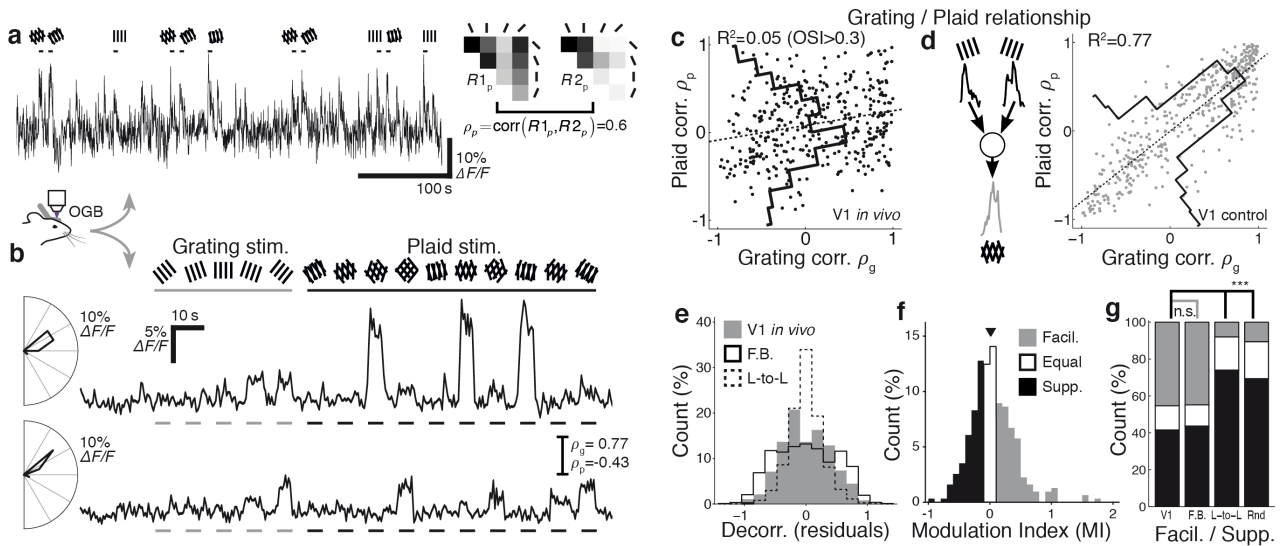

**Figure 6: Responses to contrast-oscillating plaid and grating stimuli in mouse V1 suggest feature-binding connection rules.** **a** Single-trial OGB calcium response to contrast-oscillating grating and plaid stimuli; presentation time of stimuli evoking strong responses indicated above trace. Right inset: measurement of plaid response similarity  $\rho_p$  between two neurons. **b** Trial-averaged responses (8 trials) of a pair of neurons from a single imaging site, with similar preferred orientations (polar plots at left; high  $\rho_g$ ) but with dissimilar responses to plaid stimuli (low  $\rho_p$ ). **c** Responses to grating and plaid stimuli are poorly related in orientation-tuned neurons in mouse V1 (Broad distribution of  $\rho_g$  versus  $\rho_p$  residuals — black line, low R2). **d** Control data that includes experimental noise and response variability, obtained by resampling experimental responses and assuming a like-to-like connectivity rule (inset; see Methods), predicts a strong relationship between grating and plaid representations (high R2) and is easily distinguished from observed V1 responses in **c**. **e** Decorrelation in mouse V1 is similar to the “feature-binding” model (F.B.), and much broader than the “like-to-like” model (L-to-L). **f** Responses to plaid stimuli in V1 are split between facilitating and suppressing (45% MI > 0.05; 42% MI < -0.05). **g** The distribution of facilitating (Facil.; MI > 0.05) and suppressing (Supp., MI < -0.05) responses is similar between mouse V1 and the “feature-binding” model (F.B.;  $p = 0.17$ , Fisher’s exact test). The “like-to-like” and random non-specific (Rnd) connectivity models produced predominately suppressing responses. \*\*\* $p < 0.001$ .  $n_{V1} = 313$ ;  $n_{F.B.} = 804$ ;  $n_{L-to-L} = 729$ ;  $n_{Rnd} = 729$ ; significantly responsive neurons with OSI > 0.3. Stim: stimuli; corr.: correlation; decorr.: decorrelation.

## Figure 7

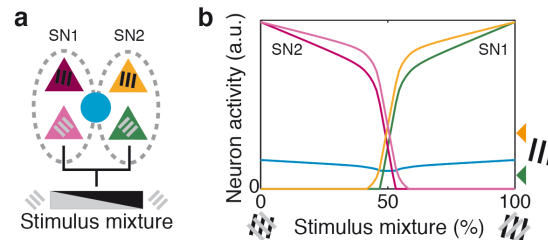

**Figure 7: Non-random connectivity supports autoassociative behaviour.** In a simple model with two subnetworks (a), presenting a linear graduated mixture between the ideal stimuli for the two subnetworks (b) results in competition and switching between network representations. When the stimulus is ideal for one subnetwork (mixture = 0% or 100%), then strong amplification of the network response occurs (compare with response of SN1 to a single grating component; arrowheads at right of b). When an approximately even mixture is presented (above and below 50%), the network switches rapidly from one representation to the other. Proportion of specific excitatory synapses  $s = 25\%$ . Dashed ovals: neurons grouped by specific excitatory connectivity. Other conventions as in Fig. 1. a.u.: arbitrary units.

## Supp. Figure 1

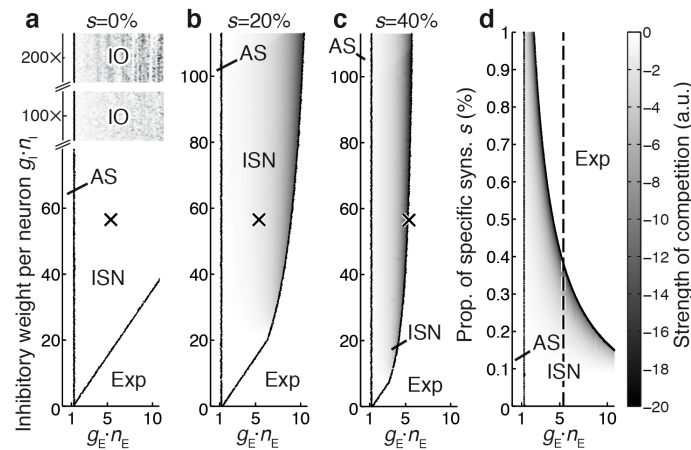

**Supplementary Figure 1: Estimated parameters for cortex place it in an Inhibition-Stabilised Network (ISN) regime, with competition provided by specific excitatory connectivity.** **a** The network stability regimes in the parameter space defined by total inhibitory weight  $g_I \cdot n_I$  and total excitatory weight  $g_E \cdot n_E$  for a random network (proportion of specific synapses  $s = 0\%$ ). Nominal parameter estimates for rodent cortex (cross) place the network in a regime that requires inhibitory feedback for stability (an ISN; [39]), but which does not lead to competition between excitatory neurons. Inhibition must be unrealistically strengthened to obtain competition ( $100\times$  and  $200\times$  estimates for rodent cortex; top of panel; shading indicates competition). However, overly-strong inhibition leads to inhibition-driven oscillations (IO). **b** When the proportion of specific synapses  $s$  is raised to 20%, nominal parameters for rodent cortex permit competition (shading indicates strength of competition). Note that the maximum excitatory strength permitted while maintaining network stability is reduced. **c** When  $s = 40\%$ , nominal parameters for rodent cortex become unstable (cross is just inside unstable region). **d** Network stability regimes for the parameter space defined by  $s$  and  $g_E \cdot n_E$ , with nominal value chosen for  $g_I \cdot n_I$  (crosses in a–c). Nominal value for  $g_E \cdot n_E$  is indicated by a dashed line. Both excitatory strength  $g_E \cdot n_E$  and the proportion of specific synapses  $s$  affect network stability and the strength of competition. Abbreviations:  $g_{I,E}$ : Synaptic strength per inhibitory or excitatory synapse;  $n_{I,E}$ : Number of synapses made by each inhibitory or excitatory neuron; AS: Intrinsically stable network, stable in the absence of inhibition; ISN: Inhibition-Stabilised Network, requiring inhibitory feedback for stability; Exp: Runaway activity due to exponentially divergent unstable fixed point; IO: Oscillatory activity due to strong inhibition.



## Supp. Figure 2

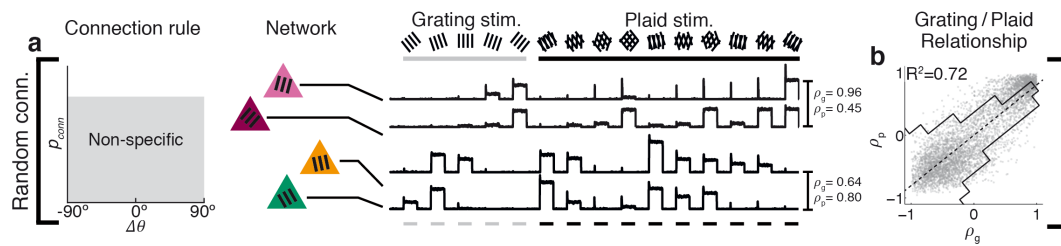

**Supplementary Figure 2: Grating and plaid responses are highly correlated in a model with random connectivity.** **a** Under the non-specific connectivity model, synapses between pairs of neurons are formed without regard to functional response similarity of the neurons. Neurons form synapses stochastically, according to spatial proximity. Two example pairs of neurons are shown, and their responses to a set of grating and plaid stimuli. **b** Neurons with similar responses to grating stimuli (high  $\rho_g$ ) always have similar responses to plaid stimuli (high  $\rho_p$ ), and vice versa.
